# Supplementary material for: The Transcriptome of Pig Spermatozoa, and Its Role in Fertility
Source: PubMed Central journal article supplement (PMC7084236; doi:10.3390/ijms21051572), 2020-02-25
Supplement: ijms-21-01572-s001.pdf [file ijms-21-01572-s001.pdf]

**Supplementary Table 1.** Expression (Mean  $\pm$  Standard Deviation of the log<sub>2</sub> average expression or transcript detection) of *Sus scrofa* specific miRNAs detected by the GeneChip™ miRNA 4.0 Array (ThermoFisher Scientific) in spermatozoa retrieved from the SRF of the ejaculate of healthy mature boars (n=3). The miRNA is designed to interrogate all mature miRNA sequences in miRBase v20. The array includes 30.424 mature miRNA (all organisms) and we select specifically the 326 *Sus scrofa*-specific miRNAs included in the array.

| Transcript ID    | Expression                                        | Accession    | Sequence |                           |
|------------------|---------------------------------------------------|--------------|----------|---------------------------|
|                  | Mean $\pm$ Standard Deviation (log <sub>2</sub> ) |              | Length   | Sequence                  |
| ssc-miR-1285     | 13.98 $\pm$ 0.13                                  | MIMAT0013954 | 24       | CUGGGCAACAUAGCGAGACCCCGU  |
| ssc-miR-16       | 12.6 $\pm$ 0.74                                   | MIMAT0007754 | 22       | UAGCAGCACGUAAAUAUUGGCG    |
| ssc-miR-4332     | 12.32 $\pm$ 0.29                                  | MIMAT0017962 | 20       | CACGGCCGCCGCCGGGCGCC      |
| ssc-miR-92a      | 12.06 $\pm$ 0.09                                  | MIMAT0013908 | 22       | UAUUGCACUUGUCCCCGGCCUGU   |
| ssc-miR-671-5p   | 11.73 $\pm$ 0.54                                  | MIMAT0025381 | 24       | AGGAAGCCCUGGAGGGGCUUGAGG  |
| ssc-miR-4334-5p  | 11.31 $\pm$ 0.05                                  | MIMAT0017966 | 19       | CCCUGGAGUGACGGGGGUG       |
| ssc-miR-425-5p   | 10.99 $\pm$ 0.15                                  | MIMAT0013917 | 23       | AAUGACACGAUCACUCCCGUUGA   |
| ssc-miR-191      | 10.57 $\pm$ 0.22                                  | MIMAT0013876 | 23       | CAACGGAAUCCCAAAGCAGCUG    |
| ssc-miR-92b-5p   | 10.53 $\pm$ 0.18                                  | MIMAT0017377 | 24       | AGGGACGGGACGCGGUGCAGUGUU  |
| ssc-miR-15b      | 10.01 $\pm$ 0.9                                   | MIMAT0002125 | 22       | UAGCAGCACAUCAUGGUUUACA    |
| ssc-miR-30d      | 9.89 $\pm$ 0.36                                   | MIMAT0013871 | 24       | UGUAAACAUCCCCGACUGGAAGCU  |
| ssc-miR-26a      | 9.62 $\pm$ 0.47                                   | MIMAT0002135 | 22       | UUCAAGUAAUCCAGGAUAGGCU    |
| ssc-miR-484      | 9.55 $\pm$ 0.14                                   | MIMAT0017974 | 20       | CCCAGGGGGCGACCCAGGCU      |
| ssc-miR-103      | 9.53 $\pm$ 0.22                                   | MIMAT0002154 | 23       | AGCAGCAUUGUACAGGGCUAUGA   |
| ssc-miR-296-3p   | 9.41 $\pm$ 0.26                                   | MIMAT0022958 | 21       | AGGGUUGGGCGGAGGCUUCC      |
| ssc-miR-30c-1-3p | 9.37 $\pm$ 0.62                                   | MIMAT0022976 | 20       | CUGGGAGAGGGUUGUUUACU      |
| ssc-miR-342      | 9.28 $\pm$ 0.18                                   | MIMAT0013944 | 25       | UCUCACACAGAAAUCGCACCCGUCA |
| ssc-miR-19b      | 9.26 $\pm$ 0.76                                   | MIMAT0013950 | 23       | UGUGCAAUCCAUGCAAACUGA     |
| ssc-miR-17-5p    | 9.25 $\pm$ 0.21                                   | MIMAT0007755 | 23       | CAAAGUGCUUACAGUGCAGGUAG   |
| ssc-miR-28-3p    | 9.23 $\pm$ 0.22                                   | MIMAT0015211 | 22       | CACUAGAUUGUGAGCUCCUGGA    |
| ssc-miR-107      | 9.2 $\pm$ 0.35                                    | MIMAT0002155 | 23       | AGCAGCAUUGUACAGGGCUAUCA   |
| ssc-miR-151-5p   | 9.17 $\pm$ 0.3                                    | MIMAT0013882 | 21       | UCGAGGAGCUCACAGUCUAGU     |
| ssc-miR-125b     | 9.03 $\pm$ 0.77                                   | MIMAT0002120 | 22       | UCCUGAGACCCUAAUUGUGA      |
| ssc-miR-22-3p    | 8.99 $\pm$ 1.03                                   | MIMAT0015710 | 22       | AAGCUGCCAGUUGAAGAACUGU    |
| ssc-miR-320      | 8.97 $\pm$ 0.38                                   | MIMAT0013878 | 23       | AAAAGCUGGGUUGAGAGGGCGAA   |
| ssc-miR-34c      | 8.9 $\pm$ 0.36                                    | MIMAT0013916 | 23       | AGGCAGUGUAGUUAGCUGAUUGC   |
| ssc-miR-4331     | 8.85 $\pm$ 0.43                                   | MIMAT0017955 | 22       | UGUGGCUGUGGUGUAGGCCAGC    |
| ssc-let-7c       | 8.83 $\pm$ 0.67                                   | MIMAT0002151 | 22       | UGAGGUAGUAGGUUGUAUGGUU    |
| ssc-miR-140-3p   | 8.7 $\pm$ 0.47                                    | MIMAT0006786 | 23       | UACCACAGGGUAGAACCACGGAC   |
| ssc-miR-744      | 8.56 $\pm$ 0.19                                   | MIMAT0015708 | 22       | UGCGGGGCUAGGGCUAACAGCA    |
| ssc-miR-106a     | 8.44 $\pm$ 0.08                                   | MIMAT0002118 | 24       | AAAAGUGCUUACAGUGCAGGUAGC  |
| ssc-miR-132      | 8.43 $\pm$ 0.23                                   | MIMAT0025361 | 22       | UACAGUCUACAGCCAUGGUCG     |

|                 |             |              |    |                          |
|-----------------|-------------|--------------|----|--------------------------|
| ssc-miR-23a     | 8.39 ± 0.44 | MIMAT0002133 | 21 | AUCACAUUGCCAGGGAUUUC     |
| ssc-miR-489     | 8.31 ± 0.23 | MIMAT0025375 | 22 | AGUGACAUCACAUAUACGGCGG   |
| ssc-miR-30e-5p  | 8.13 ± 0.88 | MIMAT0013872 | 24 | UGUAAACAUCCUUGACUGGAAGCU |
| ssc-let-7a      | 8.12 ± 0.71 | MIMAT0013865 | 22 | UGAGGUAGUAGGUUGUAUAGUU   |
| ssc-miR-30b-5p  | 7.89 ± 1.33 | MIMAT0007756 | 22 | UGUAAACAUCCUACACUCAGCU   |
| ssc-miR-128     | 7.81 ± 0.79 | MIMAT0002157 | 21 | UCACAGUGAACCGGUCUCUUU    |
| ssc-miR-182     | 7.75 ± 0.26 | MIMAT0025366 | 24 | UUUGGCAAUGGUAGAACUCACACU |
| ssc-miR-885-3p  | 7.72 ± 0.19 | MIMAT0013903 | 21 | AGGCAGCGGGGUGUAGUGGAU    |
| ssc-miR-20b     | 7.7 ± 0.36  | MIMAT0025359 | 23 | CAAAGUGCUCACAGUGCAGGUAG  |
| ssc-miR-15a     | 7.68 ± 1.5  | MIMAT0007753 | 21 | UAGCAGCACAUAAUGGUUUGU    |
| ssc-miR-30c-5p  | 7.57 ± 0.67 | MIMAT0002167 | 23 | UGUAAACAUCCUACACUCUCAGC  |
| ssc-miR-185     | 7.54 ± 0.2  | MIMAT0007759 | 22 | UGGAGAGAAAGGCAGUUCUGA    |
| ssc-miR-7137-3p | 7.53 ± 0.5  | MIMAT0028150 | 22 | AGCUGGUCUGGGAGUUCGGGG    |
| ssc-miR-151-3p  | 7.51 ± 0.26 | MIMAT0013883 | 22 | CUAGACUGAAGCUCCUUGAGGA   |
| ssc-miR-23b     | 7.49 ± 0.25 | MIMAT0013893 | 22 | AUCACAUUGCCAGGGAUUACCA   |
| ssc-miR-122     | 7.39 ± 0.62 | MIMAT0002119 | 23 | UGGAGUGUGACAAUGGUGUUUGU  |
| ssc-miR-29a     | 7.39 ± 1.43 | MIMAT0013870 | 23 | CUAGCACCAUCUGAAAUCGGUUA  |
| ssc-miR-423-5p  | 7.38 ± 0.22 | MIMAT0013880 | 23 | UGAGGGGCAGAGAGCGAGACUUU  |
| ssc-miR-361-5p  | 7.36 ± 0.14 | MIMAT0013933 | 22 | UUAUCAGAAUCUCCAGGGGUAC   |
| ssc-miR-20a     | 7.34 ± 0.97 | MIMAT0002129 | 22 | UAAAGUGCUIAUAGUGCAGGUA   |
| ssc-let-7d-5p   | 7.26 ± 0.49 | MIMAT0025356 | 22 | AGAGGUAGUAGGUUGCAUAGUU   |
| ssc-miR-130b    | 7.24 ± 0.39 | MIMAT0013922 | 22 | CAGUGCAAUGAUGAAAGGGCAU   |
| ssc-miR-100     | 7.2 ± 0.65  | MIMAT0013911 | 22 | AACCCGUAGAUCCGAACUUGUG   |
| ssc-miR-27a     | 7.2 ± 0.56  | MIMAT0002148 | 21 | UUCACAGUGGCUAAGUUCGCG    |
| ssc-miR-24-3p   | 7.19 ± 0.43 | MIMAT0002134 | 22 | UGGCUCAGUUCAGCAGGAACAG   |
| ssc-miR-193a-5p | 7.16 ± 0.16 | MIMAT0013894 | 22 | UGGGUCUUGCGGGCGAGAUGA    |
| ssc-miR-10b     | 7.04 ± 0.97 | MIMAT0013885 | 22 | UACCCUGUAGAACCGAAUUUGU   |
| ssc-miR-99a     | 6.95 ± 0.63 | MIMAT0013896 | 22 | AACCCGUAGAUCCGAUCUUGUG   |
| ssc-miR-92b-3p  | 6.79 ± 0.06 | MIMAT0013909 | 22 | UAUUGCACUCGUCCCGGCCUCC   |
| ssc-miR-874     | 6.78 ± 0.2  | MIMAT0025384 | 23 | CUGCCCUGGCCCGAGGGACCGAC  |
| ssc-miR-27b-3p  | 6.51 ± 0.8  | MIMAT0013890 | 21 | UUCACAGUGGCUAAGUUCUCG    |
| ssc-miR-18a     | 6.48 ± 0.4  | MIMAT0002161 | 22 | UAAGGUGCAUCUAGUGCAGAU    |
| ssc-miR-146a-5p | 6.46 ± 0.95 | MIMAT0022963 | 22 | UGAGAACUGAAUUCUAGGGUU    |
| ssc-miR-30a-5p  | 6.21 ± 1.54 | MIMAT0010193 | 22 | UGUAAACAUCCUCGACUGGAAG   |
| ssc-miR-28-5p   | 5.87 ± 0.35 | MIMAT0002136 | 22 | AAGGAGCUCACAGUCUUAUUGAG  |
| ssc-let-7e      | 5.86 ± 0.3  | MIMAT0013866 | 22 | UGAGGUAGGAGGUUGUAUAGUU   |
| ssc-miR-183     | 5.53 ± 1.46 | MIMAT0002145 | 23 | UAUGGCACUGGUAGAAUUCACUG  |
| ssc-miR-181a    | 5.5 ± 1.07  | MIMAT0010191 | 24 | AACAUUCAACGCUGUCGGUGAGUU |
| ssc-miR-148b-3p | 5.48 ± 2.07 | MIMAT0013901 | 22 | UCAGUGCAUCACAGAACUUUGU   |
| ssc-miR-7139-3p | 5.44 ± 0.32 | MIMAT0028154 | 22 | UAGGGCACAGGAUGGGAUGAGG   |
| ssc-miR-210     | 5.43 ± 0.45 | MIMAT0007761 | 22 | CUGUGCGUGUGACAGCGGCUGA   |
| ssc-miR-1307    | 5.27 ± 0.38 | MIMAT0013936 | 22 | ACUCGGCGUGGGCUCGGUCGUG   |
| ssc-miR-4334-3p | 5.27 ± 2.05 | MIMAT0020366 | 20 | UCCUGUCCUCCAGGAGCUC      |
| ssc-miR-339     | 5.2 ± 0.55  | MIMAT0025372 | 21 | UCCUGUCCUCCAGGAGCUCA     |

|                 |             |              |    |                            |
|-----------------|-------------|--------------|----|----------------------------|
| ssc-miR-99b     | 5.19 ± 0.33 | MIMAT0006018 | 22 | CACCCGUAGAACCGACCUUGCG     |
| ssc-miR-129b    | 5.06 ± 0.45 | MIMAT0020586 | 21 | CUUUUUGCGGUCUGGGCUUGC      |
| ssc-let-7g      | 5.02 ± 2.43 | MIMAT0013867 | 22 | UGAGGUAGUAGUUUGUACAGUU     |
| ssc-miR-125a    | 5.02 ± 0.73 | MIMAT0013897 | 23 | UCCCUGAGACCCUUUAACCUUG     |
| ssc-miR-7142-5p | 5.01 ± 0.25 | MIMAT0028159 | 23 | ACUCUCCGAGGGGCCUUAAGGG     |
| ssc-miR-365-5p  | 4.91 ± 0.6  | MIMAT0017376 | 23 | GAGGGACUUUCAGGGGCAGCUGU    |
| ssc-miR-425-3p  | 4.88 ± 0.19 | MIMAT0013918 | 22 | AUCGGGAUGUCGUGUCCGCC       |
| ssc-miR-1306-3p | 4.82 ± 0.04 | MIMAT0013938 | 21 | ACGUUGGCUCUGGUGGUGAUG      |
| ssc-miR-339-5p  | 4.8 ± 0.85  | MIMAT0013939 | 22 | UCCCUGUCCUCCAGGAGCUCAC     |
| ssc-miR-221-3p  | 4.77 ± 0.86 | MIMAT0007762 | 22 | AGCUACAUUGUCUGCUGGGUUU     |
| ssc-miR-195     | 4.75 ± 1.04 | MIMAT0013928 | 21 | UAGCAGCACAGAAUAUUGGC       |
| ssc-miR-370     | 4.73 ± 0.74 | MIMAT0025373 | 22 | GCCUGCUGGGUGGAACCUUGU      |
| ssc-miR-455-3p  | 4.56 ± 1.11 | MIMAT0013960 | 21 | GCAGUCCAUGGGCAUAUACAC      |
| ssc-miR-7134-3p | 4.53 ± 0.21 | MIMAT0028144 | 21 | AUGCGGAACCUGCGGAUACGG      |
| ssc-miR-139-5p  | 4.52 ± 0.73 | MIMAT0002159 | 22 | UCUACAGUGCACGUGUCUCCAG     |
| ssc-miR-21      | 4.48 ± 2.53 | MIMAT0002165 | 22 | UAGCUUAUCAGACUGAUGUUGA     |
| ssc-miR-3613    | 4.47 ± 2.29 | MIMAT0025387 | 20 | UGUUGUACUUUUUUUUUGU        |
| ssc-miR-652     | 4.39 ± 0.17 | MIMAT0017964 | 26 | ACAACCCUAGGAGAGGGUGCCAUUCA |
| ssc-miR-194a    | 4.24 ± 1.35 | MIMAT0025368 | 21 | UGUAACAGCAACUCCAUGUGG      |
| ssc-let-7i      | 4.19 ± 2.16 | MIMAT0002153 | 19 | UGAGGUAGUAGUUUGUGCU        |
| ssc-miR-574     | 4.15 ± 0.4  | MIMAT0013951 | 22 | CACGCUCAUGCACACACCACA      |
| ssc-miR-18b     | 4.08 ± 1.38 | MIMAT0020585 | 23 | UAAGGUGCAUCUAGUGCAGUUAG    |
| ssc-miR-664-5p  | 4.01 ± 0.29 | MIMAT0013906 | 23 | CAGGCUAGGAGAAGUGAUUGGAU    |
| ssc-miR-335     | 3.71 ± 1.92 | MIMAT0013955 | 22 | UCAAGAGCAAUAACGAAAAAUG     |
| ssc-miR-222     | 3.65 ± 1.05 | MIMAT0013942 | 24 | AGCUACAUCUGGCUACUGGGUCUC   |
| ssc-miR-331-5p  | 3.48 ± 0.91 | MIMAT0013929 | 21 | UCUAGGUAUGGUCCCAGGGAU      |
| ssc-miR-192     | 3.4 ± 1.5   | MIMAT0013910 | 21 | CUGACCUAUGAAUUGACAGCC      |
| ssc-miR-181d-5p | 3.37 ± 0.97 | MIMAT0013888 | 24 | AACAUUCAUUGUUGUCGGUGGGUU   |
| ssc-miR-345-3p  | 3.36 ± 0.63 | MIMAT0013900 | 21 | CCCUGAACUAGGGGUCUGGAG      |
| ssc-miR-202-3p  | 3.34 ± 0.88 | MIMAT0022956 | 19 | AGAGGUGUAGGCAUGGGAA        |
| ssc-miR-10a-5p  | 3.29 ± 1.09 | MIMAT0013884 | 22 | UACCCUGUAGAUCGAAUUUGU      |
| ssc-miR-532-5p  | 3.25 ± 1.03 | MIMAT0013940 | 22 | CAUGCCUUGAGUGUAGGACCGU     |
| ssc-let-7f      | 3.18 ± 1.88 | MIMAT0002152 | 22 | UGAGGUAGUAGAUUGUAUAGUU     |
| ssc-miR-423-3p  | 3.09 ± 0.93 | MIMAT0013881 | 23 | AGCUCGGUCUGAGGCCCCUCAGU    |
| ssc-miR-7140-5p | 3.09 ± 0    | MIMAT0028155 | 22 | CAACUCAAGGGGGCAUCAUUCA     |
| ssc-miR-499-5p  | 3.06 ± 1.29 | MIMAT0013877 | 21 | UUAAGACUUGCAGUGAUGUUU      |
| ssc-miR-363     | 3.02 ± 1.18 | MIMAT0015711 | 23 | AAUUGCACGGUAUCCAUCUGUAA    |
| ssc-miR-2320-5p | 2.87 ± 0.96 | MIMAT0020597 | 22 | UGGCACAGGGUCCAGCUGUCGG     |
| ssc-miR-328     | 2.87 ± 1.34 | MIMAT0013949 | 22 | CUGGCCUCUCUGCCCUUCCGU      |
| ssc-miR-124a    | 2.73 ± 0.63 | MIMAT0002156 | 21 | UAAGGCACGCGUGAAUGCCA       |
| ssc-miR-7137-5p | 2.73 ± 0.35 | MIMAT0028149 | 21 | CGGGGGAACUCCAGACCAGC       |
| ssc-miR-17-3p   | 2.71 ± 0.86 | MIMAT0015268 | 22 | ACUGCAGUGAAGGCACUUGUAG     |
| ssc-miR-486     | 2.7 ± 0.37  | MIMAT0013886 | 22 | UCCUGUACUGAGCUGCCCCGAG     |
| ssc-miR-7138-3p | 2.67 ± 0.59 | MIMAT0028152 | 22 | GAGGACUGGCCUUGCAGGGUGC     |

|                 |             |              |    |                           |
|-----------------|-------------|--------------|----|---------------------------|
| ssc-miR-19a     | 2.65 ± 0.51 | MIMAT0002128 | 23 | UGUGCAAUUCUAUGCAAACUGA    |
| ssc-miR-148a-3p | 2.56 ± 1.13 | MIMAT0002124 | 22 | UCAGUGCACUACAGAACUUUGU    |
| ssc-miR-296-5p  | 2.5 ± 0.22  | MIMAT0017952 | 21 | GAGGGCCCCCCCCAAUCCUGU     |
| ssc-miR-429     | 2.46 ± 1.63 | MIMAT0020591 | 22 | UAAUACUGUCUGGUAAUUGCCGU   |
| ssc-miR-490     | 2.42 ± 0.18 | MIMAT0025376 | 22 | CAACCUUGGAGGACUCCAUGCUG   |
| ssc-miR-490-3p  | 2.42 ± 0.18 | MIMAT0022960 | 22 | CAACCUUGGAGGACUCCAUGCUG   |
| ssc-miR-29c     | 2.39 ± 0.88 | MIMAT0002166 | 22 | UAGCACC AUUUGAAAUCGGUUA   |
| ssc-miR-2366    | 2.32 ± 0.61 | MIMAT0025388 | 22 | UGGGUCACAGAAGAGGGUCUGG    |
| ssc-miR-4339    | 2.31 ± 0.23 | MIMAT0017980 | 24 | GCUCUGAGCUGCCCCUCCUGUCC   |
| ssc-miR-30b-3p  | 2.3 ± 0.81  | MIMAT0015269 | 21 | CUGGGAGGUGGAUGUUUACUU     |
| ssc-miR-421-3p  | 2.29 ± 0.4  | MIMAT0022962 | 23 | AUCAACAGACAUUAAUUGGGCGC   |
| ssc-miR-4335    | 2.27 ± 0.07 | MIMAT0017968 | 20 | GUGCCCAGCGCUGCAGGGCA      |
| ssc-miR-503     | 2.21 ± 0.33 | MIMAT0010189 | 23 | UAGCAGCGGGAACAGUACUGCAG   |
| ssc-miR-671-3p  | 2.18 ± 0.05 | MIMAT0025382 | 21 | UCCGGUUCUCAGGGCUCACC      |
| ssc-miR-214     | 2.13 ± 0.31 | MIMAT0002147 | 21 | ACAGCAGGCACAGACAGGCAG     |
| ssc-miR-339-3p  | 2.06 ± 0.54 | MIMAT0017381 | 21 | AGCUCCUCGAGGCCAGAGCCC     |
| ssc-miR-885-5p  | 2.06 ± 0.54 | MIMAT0013902 | 22 | UCCAUAACACUACCCUGCCUCU    |
| ssc-miR-1249    | 2.04 ± 0.4  | MIMAT0025385 | 22 | ACGCCCUUCCCCCUUCUUCA      |
| ssc-miR-500     | 2.04 ± 0.97 | MIMAT0013956 | 21 | AUGCACCUGGGCAAGGAUUCU     |
| ssc-miR-181d-3p | 2.01 ± 0.88 | MIMAT0017375 | 22 | CCCACCGAGGGAUGAAUGUCAC    |
| ssc-miR-139-3p  | 2 ± 0.1     | MIMAT0022921 | 23 | UGGAGACGCGGCCUCUGUUGGAGU  |
| ssc-miR-205     | 2 ± 0.83    | MIMAT0002146 | 22 | UCCUUCAUUCCACCGGAGUCUG    |
| ssc-miR-378     | 2 ± 0.4     | MIMAT0013868 | 22 | ACUGGACUUGGAGUCAGAAGGC    |
| ssc-miR-184     | 1.98 ± 0.57 | MIMAT0002127 | 22 | UGGACGGAGAACUGAUAAAGGGU   |
| ssc-miR-324     | 1.91 ± 0.46 | MIMAT0013957 | 23 | CGCAUCCCCUAGGGCAUUGGUGU   |
| ssc-miR-2320-3p | 1.89 ± 0.4  | MIMAT0020598 | 21 | CGAUGAUGGUCCCUGUGUUUG     |
| ssc-miR-2483    | 1.83 ± 0.48 | MIMAT0025390 | 22 | AAACAUCUGGUUGGUUGAGAGA    |
| ssc-miR-1306-5p | 1.82 ± 0.13 | MIMAT0013937 | 22 | CCACCUCCCCUGCAAACGUCCA    |
| ssc-miR-152     | 1.77 ± 0.69 | MIMAT0013887 | 21 | UCAGUGCAUGACAGAACUUGG     |
| ssc-miR-345-5p  | 1.76 ± 0.02 | MIMAT0013899 | 20 | GCUGACUCCUAGUCCAGUGC      |
| ssc-miR-615     | 1.75 ± 0.55 | MIMAT0020595 | 21 | UCCGAGCCUGGGUCUCCUCU      |
| ssc-miR-181b    | 1.74 ± 0.76 | MIMAT0002126 | 24 | AACAUAUCAUUGCUGUCGGUGGGUU |
| ssc-miR-149     | 1.71 ± 0.22 | MIMAT0018379 | 23 | UCUGGCUCCGUGUCUUCACUCCC   |
| ssc-miR-1343    | 1.67 ± 0.51 | MIMAT0020596 | 22 | CUCCUGGGGCCCGCACUCUCGC    |
| ssc-miR-30c-3p  | 1.64 ± 0.46 | MIMAT0022922 | 22 | CUGGGAGAAGGCUGUUUACUCU    |
| ssc-miR-382     | 1.58 ± 0.13 | MIMAT0017956 | 21 | AAGUUGUUCGUGGUGGAUUCG     |
| ssc-miR-7144-5p | 1.58 ± 0.14 | MIMAT0028163 | 22 | ACUUUCCCGGGAUUUGGAGCGC    |
| ssc-miR-1839-5p | 1.55 ± 0.26 | MIMAT0013952 | 22 | AAGGUAGAUAGAACAGGUCUUG    |
| ssc-miR-504     | 1.55 ± 0.24 | MIMAT0013931 | 23 | AGACCCUGGUCUGCACUCUAUCU   |
| ssc-miR-383     | 1.53 ± 0.28 | MIMAT0017972 | 21 | CCACAGCACUGCCUGGUCAGA     |
| ssc-let-7d-3p   | 1.49 ± 0.65 | MIMAT0025357 | 22 | CUAUACGACCUGCUGCCUUUCU    |
| ssc-miR-31      | 1.48 ± 0.71 | MIMAT0025360 | 22 | AGGCAAGAUGCUGGCAUAGCUG    |
| ssc-miR-532-3p  | 1.46 ± 0.37 | MIMAT0013941 | 22 | CCUCCCACACCCAAGGCUUGCA    |
| ssc-miR-1296-5p | 1.45 ± 0.16 | MIMAT0022964 | 22 | UUAGGGCCUCCUGGCUCCAUCUCC  |

|                 |             |              |    |                           |
|-----------------|-------------|--------------|----|---------------------------|
| ssc-miR-769-3p  | 1.45 ± 0.43 | MIMAT0013958 | 23 | CUGGGAUCUCUGGGGUCUUGGUU   |
| ssc-miR-4338    | 1.42 ± 0.18 | MIMAT0017978 | 22 | AUGUUCAGUCUCAGUGGGAACC    |
| ssc-miR-212     | 1.41 ± 0.53 | MIMAT0025370 | 23 | ACCUUGGCUCUAGACUGCUUACU   |
| ssc-miR-491     | 1.41 ± 0.24 | MIMAT0020592 | 22 | AGUGGGGAACCCUCCAUGAGG     |
| ssc-miR-22-5p   | 1.39 ± 0.72 | MIMAT0015709 | 22 | AGUUCUUCAGUGGCAAGCUUUA    |
| ssc-miR-490-5p  | 1.38 ± 0.14 | MIMAT0017959 | 20 | CCAUGGAUCCCCAGGUGGGU      |
| ssc-miR-206     | 1.37 ± 0.32 | MIMAT0013864 | 22 | UGGAAUGUAAGGAAGUGUGUGA    |
| ssc-miR-129a    | 1.33 ± 0.22 | MIMAT0013959 | 22 | AAGCCCUUACCCCAAAAAGCAU    |
| ssc-miR-452     | 1.32 ± 0.14 | MIMAT0025374 | 22 | AACUGUUUGCAGAGGAAACUGA    |
| ssc-miR-676-3p  | 1.32 ± 0.47 | MIMAT0013943 | 21 | CCGUCCUAAAGGUUGUUGAGUU    |
| ssc-miR-34a     | 1.3 ± 0.4   | MIMAT0007757 | 22 | UGGCAGUGUCUUAAGCUGGUUGU   |
| ssc-miR-7136-5p | 1.22 ± 0.53 | MIMAT0028147 | 22 | UCUGGUCCAGACACUGUGGAGC    |
| ssc-miR-7134-5p | 1.21 ± 0.28 | MIMAT0028143 | 21 | AUGUCCGCGGGUCCCUAUCC      |
| ssc-miR-505     | 1.19 ± 0.16 | MIMAT0013961 | 22 | UCAACACUUGCUGGUUCCUCU     |
| ssc-miR-432-3p  | 1.17 ± 0.15 | MIMAT0017384 | 20 | UGGAUGGCUCCUCAUGGCCU      |
| ssc-miR-7142-3p | 1.17 ± 0.36 | MIMAT0028160 | 22 | UUUGUUGGCUCCUCUGAAGUGA    |
| ssc-miR-155-5p  | 1.14 ± 0.06 | MIMAT0022959 | 22 | UUAAUGCUAAUUGUGAUAGGGG    |
| ssc-miR-7140-3p | 1.14 ± 0.2  | MIMAT0028156 | 22 | AUGAUGCCCUUAGAGUUGAGC     |
| ssc-miR-150     | 1.12 ± 0.3  | MIMAT0025365 | 22 | UCUCCCAACCCUUGUACCAGUG    |
| ssc-miR-130a    | 1.11 ± 0.44 | MIMAT0007758 | 22 | CAGUGCAAUGUUAAAAGGGCAU    |
| ssc-miR-146b    | 1.09 ± 0.1  | MIMAT0010190 | 21 | UGAGAACUGAAUCCAAGGC       |
| ssc-miR-30a-3p  | 1.09 ± 0.33 | MIMAT0015300 | 22 | CUUCAGUCGGAUGUUUGCAGC     |
| ssc-miR-424-3p  | 1.08 ± 0.14 | MIMAT0013921 | 21 | CAAAACGUGAGGGCUGCUAU      |
| ssc-miR-362     | 1.06 ± 0.25 | MIMAT0017958 | 25 | AAUCCUUGGAACCUAGGUGUGAGUG |
| ssc-miR-487b    | 1.04 ± 0.06 | MIMAT0017973 | 22 | GUGGUUAUCCUGUCCUGUUCG     |
| ssc-miR-148a-5p | 1.03 ± 0.18 | MIMAT0022920 | 22 | AAAGUUCUGAGACACUCCGACU    |
| ssc-miR-497     | 1.03 ± 0.43 | MIMAT0013926 | 21 | CAGCAGCACACUGUGGUUUGU     |
| ssc-miR-301     | 1.02 ± 0.08 | MIMAT0002138 | 23 | CAGUCCAAUAGUAUUGUCAAAAGC  |
| ssc-miR-208b    | 1.01 ± 0.07 | MIMAT0013912 | 22 | AUAAGACGAACAAAAGGUUUGU    |
| ssc-miR-331-3p  | 1.01 ± 0.25 | MIMAT0013930 | 21 | GCCCCUGGGCCUAUCCUAGAA     |
| ssc-miR-664-3p  | 1.01 ± 0.04 | MIMAT0013907 | 24 | UAUUCAUUUUAUCUCCAGCCUACA  |
| ssc-miR-126-3p  | 1 ± 0.3     | MIMAT0018378 | 22 | UCGUACCGUGAGUAAUAAUGCG    |
| ssc-miR-1296-3p | 1 ± 0.05    | MIMAT0017976 | 22 | GAGUGGGGUUUUGACCCUAACC    |
| ssc-miR-7       | 1 ± 0.59    | MIMAT0002141 | 24 | UGGAAGACUAGUGAUUUUGUUGUU  |
| ssc-miR-708-5p  | 0.99 ± 0.2  | MIMAT0013945 | 23 | AAGGAGCUUACAAUCUAGCUGGG   |
| ssc-miR-769-5p  | 0.99 ± 0.57 | MIMAT0020363 | 21 | UGAGACCUCUGGGUUCUGAGC     |
| ssc-miR-30e-3p  | 0.98 ± 0.1  | MIMAT0013873 | 22 | CUUCAGUCGGAUGUUUACAGC     |
| ssc-miR-361-3p  | 0.98 ± 0.08 | MIMAT0013934 | 24 | CCCCAGGUGUGAUUCUGAUUUGC   |
| ssc-miR-374a-5p | 0.98 ± 0.12 | MIMAT0013913 | 22 | UUAAUACAACCUGAUAAAGUG     |
| ssc-miR-186     | 0.97 ± 0.05 | MIMAT0002162 | 23 | CAAAGAAUUCUCCUUUUGGGCUU   |
| ssc-miR-199b-3p | 0.97 ± 0.25 | MIMAT0007760 | 22 | UACAGUAGUCUGCACAUUGGUU    |
| ssc-miR-542-5p  | 0.95 ± 0.23 | MIMAT0013924 | 21 | UCGGGGAUCAUCAUGUCACGA     |
| ssc-miR-1271    | 0.94 ± 0.03 | MIMAT0017967 | 20 | UGCCUGCUAUGUGCCAGGCA      |
| ssc-miR-194b-5p | 0.94 ± 0.23 | MIMAT0020365 | 22 | UGUAACAGCGACUCCAUGUGGA    |

|                 |             |              |    |                          |
|-----------------|-------------|--------------|----|--------------------------|
| ssc-miR-432-5p  | 0.94 ± 0.18 | MIMAT0013946 | 21 | UCUUGGAGUAGGUCAUUGGGU    |
| ssc-miR-374a-3p | 0.93 ± 0.3  | MIMAT0013914 | 22 | CUUAUCAGGUUGUAUUGUAAUU   |
| ssc-miR-27b-5p  | 0.92 ± 0.12 | MIMAT0013889 | 23 | AGAGCUUAGCUGAUUGGUGAACA  |
| ssc-miR-143-5p  | 0.91 ± 0.06 | MIMAT0017374 | 21 | GGUGCAGUGCUGCAUCUCUGG    |
| ssc-miR-24-1-5p | 0.91 ± 0    | MIMAT0015210 | 24 | GUGCCUACUGAGCUGAAACACAGU |
| ssc-miR-323     | 0.91 ± 0.24 | MIMAT0002139 | 22 | GCACAUUACACGGUCGACCUCU   |
| ssc-miR-376a-3p | 0.91 ± 0.24 | MIMAT0015716 | 21 | AUCAUAGAGGAAAAUCCACGU    |
| ssc-miR-551a    | 0.91 ± 0.08 | MIMAT0025379 | 20 | GCGACCCACUCUUGGUUUCC     |
| ssc-miR-7135-3p | 0.91 ± 0.16 | MIMAT0028146 | 22 | AUCUGUCUGUGUCUCUGAGCAG   |
| ssc-miR-628     | 0.89 ± 0.32 | MIMAT0013953 | 22 | AUGCUGACAUAUUUACUAGAGG   |
| ssc-miR-10a-3p  | 0.88 ± 0.17 | MIMAT0022954 | 21 | CAAUUUCGUUUCUAGGGGAAU    |
| ssc-miR-215     | 0.88 ± 0.14 | MIMAT0010192 | 21 | AUGACCUAUGAAUUGACAGAC    |
| ssc-miR-224     | 0.87 ± 0.03 | MIMAT0002132 | 23 | CAAGUCACUAGUGGUUCCGUUUA  |
| ssc-miR-7141-3p | 0.87 ± 0.26 | MIMAT0028158 | 21 | UCUUAACGUCCAAACCGUUC     |
| ssc-miR-148b-5p | 0.86 ± 0.62 | MIMAT0022955 | 23 | GAAGUUCUGUUAUACACUCAGGC  |
| ssc-miR-181c    | 0.86 ± 0.34 | MIMAT0002144 | 22 | AACAUUAACUGUCGGUGAGU     |
| ssc-miR-204     | 0.86 ± 0.03 | MIMAT0002164 | 22 | UUCCCUUUGUCAUCCU AUGCCU  |
| ssc-miR-299     | 0.86 ± 0.09 | MIMAT0015712 | 21 | AUGGUUUACCGUCCCAUAC      |
| ssc-miR-545-5p  | 0.86 ± 0.33 | MIMAT0020593 | 21 | UCAGUAAAUGUUUAUUGGAUG    |
| ssc-miR-582     | 0.86 ± 0.08 | MIMAT0025380 | 22 | UAACCGGUUGAACAACUGAACC   |
| ssc-miR-7143-3p | 0.86 ± 0.12 | MIMAT0028162 | 23 | UCUGCACUUGAAGCUGAGACUGA  |
| ssc-miR-7144-3p | 0.86 ± 0.06 | MIMAT0028164 | 22 | GCUCUUGUCCCGAGACCGGA     |
| ssc-miR-1224    | 0.85 ± 0.33 | MIMAT0017965 | 20 | CACCUCCUCUCUCCUCAGGU     |
| ssc-miR-326     | 0.85 ± 0.03 | MIMAT0002140 | 20 | CCUCUGGGCCCUUCCUCCAG     |
| ssc-miR-138     | 0.84 ± 0.29 | MIMAT0025363 | 21 | AGCUGGUGUUGUGAAUCAGGC    |
| ssc-miR-217     | 0.84 ± 0.17 | MIMAT0002131 | 24 | UACUGCAUCAGGAACUGAUUGGAU |
| ssc-miR-450b-3p | 0.84 ± 0.31 | MIMAT0017380 | 21 | UUGGGAACAUUUUGCAUCCAU    |
| ssc-miR-424-5p  | 0.83 ± 0.27 | MIMAT0013920 | 22 | CAGCAGCAAUUC AUGUUUGAA   |
| ssc-miR-676-5p  | 0.83 ± 0.16 | MIMAT0017382 | 22 | CUCUCAAUCUCAGGACUCGCA    |
| ssc-miR-193a-3p | 0.81 ± 0.22 | MIMAT0013895 | 22 | AACUGGCCUACAAAGUCCAGU    |
| ssc-miR-708-3p  | 0.81 ± 0.13 | MIMAT0017383 | 23 | CAACUAGACUGUGAGCUUCUAGA  |
| ssc-miR-101     | 0.8 ± 0.09  | MIMAT0010185 | 21 | UACAGUACUGUGAU AACUGAA   |
| ssc-miR-1468    | 0.8 ± 0.13  | MIMAT0025386 | 22 | CUCCGUUUGCCUGUUUUGCUGA   |
| ssc-miR-196a    | 0.79 ± 0.03 | MIMAT0002163 | 22 | UAGGUAGUUUCAUGUUGUUGGG   |
| ssc-miR-219     | 0.79 ± 0.5  | MIMAT0020590 | 22 | AGAGUUGAGUCUGGACGUCCCG   |
| ssc-miR-142-5p  | 0.78 ± 0.18 | MIMAT0013919 | 21 | CAUAAAAGUAGAAAGCACUACU   |
| ssc-miR-451     | 0.78 ± 0.19 | MIMAT0018382 | 22 | AAACCGUUAACCAUUCUGAGUU   |
| ssc-miR-7136-3p | 0.78 ± 0.04 | MIMAT0028148 | 22 | UCUCAGUGUUUGAACCAGAAGC   |
| ssc-miR-153     | 0.77 ± 0.11 | MIMAT0002160 | 20 | UUGCAUAGUCACAAAAGUGA     |
| ssc-miR-199a-3p | 0.77 ± 0.13 | MIMAT0013875 | 22 | ACAGUAGUCUGCACAUUGGUUA   |
| ssc-miR-133b    | 0.76 ± 0.16 | MIMAT0013869 | 23 | UUUGGUCCCCUUAACCAGCUAU   |
| ssc-miR-374b-5p | 0.76 ± 0.05 | MIMAT0013915 | 22 | AUAUAAUACAACCGCUAAGUG    |
| ssc-miR-381     | 0.76 ± 0.25 | MIMAT0017957 | 23 | AGCGAGGUUGCCCUUUGUAUAAU  |
| ssc-miR-545-3p  | 0.76 ± 0.07 | MIMAT0020594 | 22 | AUCAACAAACAUUUAUUGUGUG   |

|                 |             |              |    |                            |
|-----------------|-------------|--------------|----|----------------------------|
| ssc-miR-7143-5p | 0.76 ± 0.06 | MIMAT0028161 | 24 | AAGCUCAGCUCUGAAGUGCAGAGG   |
| ssc-miR-137     | 0.75 ± 0.19 | MIMAT0025362 | 23 | UUAUUGCUUAAGAAUACGCGUAG    |
| ssc-miR-144     | 0.75 ± 0.02 | MIMAT0025364 | 19 | UACAGUAUAGAUGAUGUAC        |
| ssc-miR-202-5p  | 0.75 ± 0.14 | MIMAT0013948 | 21 | UUCCU AUGCAUUAUACUUCUUU    |
| ssc-miR-218     | 0.75 ± 0.23 | MIMAT0025371 | 21 | UUGUGCUUGAUCUAACCAUGU      |
| ssc-miR-218-5p  | 0.75 ± 0.23 | MIMAT0022961 | 21 | UUGUGCUUGAUCUAACCAUGU      |
| ssc-miR-29b     | 0.75 ± 0.37 | MIMAT0002137 | 23 | UAGCACCAUUUGAAAUCAGUGUU    |
| ssc-miR-338     | 0.75 ± 0.25 | MIMAT0015713 | 22 | UCCAGCAUCAGUGAUUUUGUUG     |
| ssc-miR-140-5p  | 0.74 ± 0.16 | MIMAT0002143 | 21 | AGUGGUUUUACCCUAUGGUAG      |
| ssc-miR-450c-5p | 0.74 ± 0.12 | MIMAT0015717 | 22 | UUUUGCGAUGUGUCCUAAUAC      |
| ssc-miR-493-5p  | 0.74 ± 0.05 | MIMAT0025377 | 22 | UUGUACAUGGUAGGCUUUCAU      |
| ssc-miR-9-1     | 0.74 ± 0.07 | MIMAT0002168 | 23 | UCUUUGGUUAUCUAGCUGUAUGA    |
| ssc-miR-9-2     | 0.74 ± 0.07 | MIMAT0002169 | 23 | UCUUUGGUUAUCUAGCUGUAUGA    |
| ssc-miR-135     | 0.73 ± 0.07 | MIMAT0002121 | 23 | UAUGGCUUUUUAUCCUAUGUGA     |
| ssc-miR-194b-3p | 0.73 ± 0.13 | MIMAT0017951 | 22 | CCAGUGGAGAUGCUGUUACCUU     |
| ssc-miR-221-5p  | 0.73 ± 0.13 | MIMAT0022949 | 26 | ACCUGGCAUACAAUGUAGAUUUCUGU |
| ssc-miR-145-5p  | 0.72 ± 0.05 | MIMAT0002123 | 24 | GUCCAGUUUCCCAGGAUCCCUU     |
| ssc-miR-7138-5p | 0.71 ± 0.04 | MIMAT0028151 | 23 | UCCCAGCAAGUGUCCAUCAUCU     |
| ssc-miR-218b    | 0.7 ± 0.11  | MIMAT0020589 | 22 | UUGUGCUUGAUCUAACCAUGUG     |
| ssc-miR-365-3p  | 0.7 ± 0.13  | MIMAT0013904 | 22 | UAAUGCCCCUAAAAUCCUUAU      |
| ssc-miR-9       | 0.7 ± 0.08  | MIMAT0025358 | 22 | UCUUUGGUUAUCUAGCUGUAUG     |
| ssc-miR-133a-3p | 0.69 ± 0.15 | MIMAT0010186 | 21 | UUGGUCCCCUUAACCAGCUG       |
| ssc-miR-1839-3p | 0.69 ± 0.24 | MIMAT0017385 | 21 | AGACCUACUUUCUACCAACA       |
| ssc-miR-187     | 0.69 ± 0.14 | MIMAT0020587 | 22 | UCGUGUCUUGUGUUGCAGCCGG     |
| ssc-miR-196b-3p | 0.69 ± 0.37 | MIMAT0017379 | 22 | CGACAGCACGACACUGCCUUCA     |
| ssc-miR-325     | 0.69 ± 0.2  | MIMAT0002150 | 23 | CCUAGUAGGUGUUCAGUAAGUGU    |
| ssc-miR-411     | 0.69 ± 0.1  | MIMAT0017954 | 20 | AUGUAACACGGUCCACUAAC       |
| ssc-miR-935     | 0.69 ± 0.41 | MIMAT0013947 | 23 | CCAGUUACCGCUUCCGCUACCGC    |
| ssc-miR-136     | 0.68 ± 0.09 | MIMAT0002158 | 23 | ACUCCAUUUGUUUGAUGAUGGA     |
| ssc-miR-24-2-5p | 0.68 ± 0.07 | MIMAT0026468 | 23 | GUGCCUACUGAGCUGAUUUCAGU    |
| ssc-miR-493-3p  | 0.68 ± 0.06 | MIMAT0025378 | 22 | UGAAGGUCUACUGUGUGCCAGG     |
| ssc-miR-494     | 0.68 ± 0.02 | MIMAT0017979 | 22 | AGGUUGUCGUGUUGUCUUCUCU     |
| ssc-miR-758     | 0.68 ± 0.42 | MIMAT0015719 | 21 | UUUGUGACCUGGUCCACUAAC      |
| ssc-miR-143-3p  | 0.66 ± 0.26 | MIMAT0013879 | 21 | UGAGAUGAAGCACUGUAGCUC      |
| ssc-miR-340     | 0.66 ± 0.14 | MIMAT0013891 | 22 | UUUAAAAGCAAUGAGACUGAUU     |
| ssc-miR-450a    | 0.66 ± 0.18 | MIMAT0010188 | 22 | UUUUGCGAUGUGUCCUAAUUAU     |
| ssc-miR-1       | 0.65 ± 0.04 | MIMAT0010187 | 21 | UGGAAUGUAAAAGAAGUAUGUA     |
| ssc-miR-105-2   | 0.65 ± 0.05 | MIMAT0002117 | 20 | UCAA AUGCUCAGACUCCUUG      |
| ssc-miR-369     | 0.65 ± 0.05 | MIMAT0015714 | 21 | AAUAAUACAUGGUUGAUCUUU      |
| ssc-miR-450b-5p | 0.65 ± 0.16 | MIMAT0013927 | 22 | UUUUGCAAUAUGUCCUGAAUA      |
| ssc-miR-105-1   | 0.64 ± 0.14 | MIMAT0002116 | 20 | UCAA AUGCUCAGACUCCUGU      |
| ssc-miR-2411    | 0.64 ± 0.38 | MIMAT0025389 | 22 | UGGAGUGACUGUCAGAUGCAGC     |
| ssc-miR-455-5p  | 0.64 ± 0.06 | MIMAT0022957 | 22 | UAUGUGCCUUUGGACUACAUCG     |
| ssc-miR-126-5p  | 0.63 ± 0.12 | MIMAT0018377 | 21 | CAUUUUACUUUUGGUACGCG       |

|                 |             |              |    |                          |
|-----------------|-------------|--------------|----|--------------------------|
| ssc-miR-142-3p  | 0.63 ± 0.12 | MIMAT0020362 | 22 | UGUAGUGUUUCCUACUUUAUGG   |
| ssc-miR-146a-3p | 0.63 ± 0.03 | MIMAT0017971 | 22 | CCUGUGAAGUUUAGUUCUUCAG   |
| ssc-miR-155-3p  | 0.62 ± 0.14 | MIMAT0017953 | 21 | UCCUACAUGUUAGCAUUAACA    |
| ssc-miR-190b    | 0.62 ± 0.12 | MIMAT0020588 | 22 | UGAU AUGUUUGAU AUUGGGUUG |
| ssc-miR-196b    | 0.62 ± 0.03 | MIMAT0025369 | 22 | UAGGUAGUUUCCUGUUGUUGGG   |
| ssc-miR-196b-5p | 0.62 ± 0.03 | MIMAT0013923 | 22 | UAGGUAGUUUCCUGUUGUUGGG   |
| ssc-miR-218-3p  | 0.62 ± 0.06 | MIMAT0017969 | 21 | AUGGUUCUGUCAAGCACCAUG    |
| ssc-miR-374b-3p | 0.62 ± 0.04 | MIMAT0017378 | 22 | CUUAUCAGGUUGUAUUAUCAUU   |
| ssc-miR-376a-5p | 0.62 ± 0    | MIMAT0015715 | 23 | GUAGAUUCUCCUUCUAUGAGUAC  |
| ssc-miR-450c-3p | 0.62 ± 0.06 | MIMAT0015718 | 22 | AUUGGGAACAUUUUGCAUUCGU   |
| ssc-miR-499-3p  | 0.62 ± 0.19 | MIMAT0017373 | 22 | AACAUCACAGCAAGUCUGUGCU   |
| ssc-miR-542-3p  | 0.62 ± 0.11 | MIMAT0013925 | 22 | UGUGACAGAUUGAU AACUGAAA  |
| ssc-miR-7135-5p | 0.62 ± 0.06 | MIMAT0028145 | 21 | UCUCUGAGACACUGACUGUGG    |
| ssc-miR-95      | 0.62 ± 0.3  | MIMAT0002142 | 22 | UUCAACGGGUUUUAUUGAGCA    |
| ssc-miR-376c    | 0.61 ± 0.12 | MIMAT0017960 | 22 | GUGGAUAUUCUUCUAUGUUUA    |
| ssc-miR-4337    | 0.61 ± 0.12 | MIMAT0017977 | 22 | AGGGUAUAUAAGCCUUCACUGG   |
| ssc-miR-199b-5p | 0.6 ± 0.24  | MIMAT0017339 | 22 | CCCAGUGUUUAGACUAUCUGUU   |
| ssc-miR-98      | 0.6 ± 0.03  | MIMAT0013905 | 22 | UGAGGUAGUAAGUUGUAUUGUU   |
| ssc-miR-190a    | 0.59 ± 0.06 | MIMAT0025367 | 21 | UGAU AUGUUUGAU AUUAGG    |
| ssc-miR-32      | 0.59 ± 0.14 | MIMAT0002149 | 21 | UAUUGCACAUAACUAAGUUGC    |
| ssc-miR-199a-5p | 0.58 ± 0.25 | MIMAT0013874 | 23 | CCCAGUGUUCAGACUACCUGUUC  |
| ssc-miR-421-5p  | 0.58 ± 0.51 | MIMAT0017970 | 24 | CCUCAUUAAAUGUUUGUUGAAUGA |
| ssc-miR-127     | 0.54 ± 0.13 | MIMAT0013932 | 22 | UCGGAUCCGUCUGAGCUUGGCU   |
| ssc-miR-1277    | 0.54 ± 0.16 | MIMAT0013935 | 22 | UACGUAGAUUAUAUGUAUUUU    |
| ssc-miR-133a-5p | 0.54 ± 0.27 | MIMAT0015299 | 22 | AGCUGGUAAAUGGAACCAAU     |
| ssc-miR-145-3p  | 0.54 ± 0.19 | MIMAT0022919 | 22 | GGAUUCCUGGAAUACUGUUCU    |
| ssc-miR-376b    | 0.51 ± 0.04 | MIMAT0017961 | 22 | GUGGCUAUUCUUCUAUGUUUA    |
| ssc-miR-7141-5p | 0.51 ± 0.02 | MIMAT0028157 | 21 | GACGGUUUGGACGUUAAGAAC    |
| ssc-miR-7139-5p | 0.48 ± 0.21 | MIMAT0028153 | 23 | CCAUUCCUUCGUCUGUGCACUAG  |
| ssc-miR-216     | 0.4 ± 0.13  | MIMAT0002130 | 23 | UAAUCUCAGCUGGCAACUGUGAG  |



**Supplementary Table 2.** Differential gene expression using a microarrays platform (GeneChip® Porcine Gene 1.0 ST Array) of 521 transcripts (347 transcripts up-regulated and 174 transcripts down-regulated) in high-fertile relative with low-fertile males. Annotation of the full gene name for the transcript and up- (positive fold change) and down-regulation (negative fold change in high-fertile males in comparison to low-fertile males. The Porcine Genome Array provides comprehensive coverage of the *S. scrofa* transcriptome. The array contains 23,937 probe sets that interrogate approximately 23,256 transcripts from 20,201 *Sus scrofa* genes. The sequence information for this array was selected from public data sources including UniGene GenBank® mRNAs, and GenBank porcine mitochondrial and rRNA sequences.

| UP-REGULATED GENES in high-fertile boars vs. low-fertile boars | DESCRIPTION                                                                  | Fold Change | DOWN-REGULATED GENES in high-fertile boars vs. low-fertile boars | DESCRIPTION                                                                                                                                           | Fold Change |
|----------------------------------------------------------------|------------------------------------------------------------------------------|-------------|------------------------------------------------------------------|-------------------------------------------------------------------------------------------------------------------------------------------------------|-------------|
| LOC100739568                                                   | replication factor C subunit 1-like                                          | 5.72        | LOC102162067                                                     | interleukin-6 receptor subunit alpha-like                                                                                                             | -1.09       |
| AGPAT2                                                         | 1-acylglycerol-3-phosphate O-acyltransferase 2                               | 3.53        | CRHBP                                                            | corticotropin releasing hormone binding protein                                                                                                       | -1.1        |
| FBXW5                                                          | F-box and WD repeat domain containing 5                                      | 3.52        | LOC106509016                                                     | transmembrane protein 62-like                                                                                                                         | -1.1        |
| PPP1R16A                                                       | protein phosphatase 1, regulatory subunit 16A                                | 3.34        | TMEM171                                                          | transmembrane protein 171                                                                                                                             | -1.13       |
| PIM1                                                           | Pim-1 proto-oncogene, serine/threonine kinase                                | 3.26        | PPP1R26                                                          | protein phosphatase 1, regulatory subunit 26                                                                                                          | -1.14       |
| RAB7A                                                          | RAB7A, member RAS oncogene family                                            | 3.26        | LOC100155532                                                     | olfactory receptor 49-like                                                                                                                            | -1.17       |
| C12H17orf97                                                    | chromosome 12 open reading frame, human C17orf97                             | 3.1         | LOC100739080; LOC100517351                                       | mast cell protease 3-like                                                                                                                             | -1.17       |
| TMEM239; C17H20orf141                                          | transmembrane protein 239; chromosome 17 open reading frame, human C20orf141 | 3.1         | MEF2C; LOC100625305                                              | myocyte enhancer factor 2C; myocyte-specific enhancer factor 2C-like                                                                                  | -1.17       |
| SAE1                                                           | SUMO1 activating enzyme subunit 1                                            | 3.01        | CDSN                                                             | corneodesmosin                                                                                                                                        | -1.18       |
| TSSK6                                                          | testis-specific serine kinase 6                                              | 2.91        | GATM                                                             | glycine amidinotransferase (L-arginine:glycine amidinotransferase)                                                                                    | -1.18       |
| WNT3                                                           | wingless-type MMTV integration site family, member 3                         | 2.91        | ME1                                                              | malic enzyme 1, NADP(+)-dependent, cytosolic                                                                                                          | -1.2        |
| CARHSP1                                                        | calcium regulated heat stable protein 1, 24kDa                               | 2.88        | RGMB; LOC100525212                                               | repulsive guidance molecule family member B; RGM domain family member B-like                                                                          | -1.2        |
| UBQLNL                                                         | ubiquilin-like                                                               | 2.79        | CBLN3                                                            | cerebellin 3 precursor                                                                                                                                | -1.21       |
| TSSK2                                                          | testis-specific serine kinase 2                                              | 2.77        | GOLM1                                                            | golgi membrane protein 1                                                                                                                              | -1.21       |
| MAP1LC3A                                                       | microtubule-associated protein 1 light chain 3 alpha                         | 2.71        | INPP4A; LOC102166683                                             | inositol polyphosphate-4-phosphatase type I A; uncharacterized LOC102166683                                                                           | -1.21       |
| RABAC1                                                         | Rab acceptor 1 (prenylated)                                                  | 2.68        | LOC106510685; LOC106510683                                       | desmocollin-2-like; uncharacterized LOC106510683                                                                                                      | -1.21       |
| PHKG2                                                          | phosphorylase kinase, gamma 2 (testis)                                       | 2.66        | TWISTNB; LOC106504098                                            | TWIST neighbor; DNA-directed RNA polymerase I subunit RPA43-like                                                                                      | -1.21       |
| MTHFS                                                          | methylenetetrahydrofolate synthetase domain containing                       | 2.61        | AKR1C4; AKR1CL1                                                  | aldo-keto reductase family 1, member C4 (chlordecone reductase; 3-alpha hydroxysteroid dehydrogenase, type I; dihydrodiol dehydrogenase 4); aldo-keto | -1.22       |

|                       |                                                                                                                                                                   |      |                     |                                                                                                                                                                                          |       |
|-----------------------|-------------------------------------------------------------------------------------------------------------------------------------------------------------------|------|---------------------|------------------------------------------------------------------------------------------------------------------------------------------------------------------------------------------|-------|
|                       |                                                                                                                                                                   |      |                     | reductase family 1, member C-like<br>1                                                                                                                                                   |       |
| CSNK1G2               | casein kinase 1, gamma 2                                                                                                                                          | 2.56 | ANKRD55             | ankyrin repeat domain 55                                                                                                                                                                 | -1.22 |
| C9H11orf71            | chromosome 9 open reading frame.<br>human C11orf71                                                                                                                | 2.54 | CATSPERB            | catsper channel auxiliary subunit<br>beta                                                                                                                                                | -1.23 |
| AGBL5                 | ATP/GTP binding protein-like 5                                                                                                                                    | 2.51 | CMYA5; LOC100738205 | cardiomyopathy associated 5;<br>cardiomyopathy-associated protein<br>5-like                                                                                                              | -1.23 |
| SGSM2                 | small G protein signaling modulator 2                                                                                                                             | 2.47 | HR                  | hair growth associated                                                                                                                                                                   | -1.23 |
| TIMP2                 | TIMP metalloproteinase inhibitor 2                                                                                                                                | 2.47 | LOC100523158        | spatacsin-like                                                                                                                                                                           | -1.23 |
| DUSP18                | dual specificity phosphatase 18                                                                                                                                   | 2.45 | LOC100737852        | peptidyl-prolyl cis-trans isomerase<br>C-like                                                                                                                                            | -1.23 |
| SARNP                 | SAP domain containing<br>ribonucleoprotein                                                                                                                        | 2.45 | CXCR4               | chemokine (C-X-C motif) receptor<br>4                                                                                                                                                    | -1.24 |
| TNP1                  | transition protein 1 (during histone to<br>protamine replacement)                                                                                                 | 2.45 | METTL18             | methyltransferase like 18                                                                                                                                                                | -1.24 |
| FAM57A                | family with sequence similarity 57.<br>member A                                                                                                                   | 2.44 | SERPINE2            | serpin peptidase inhibitor, clade E<br>(nexin, plasminogen activator<br>inhibitor type 1), member 2                                                                                      | -1.24 |
| EHD1                  | EH-domain containing 1                                                                                                                                            | 2.43 | SLC25A4             | solute carrier family 25<br>(mitochondrial carrier; adenine<br>nucleotide translocator), member 4                                                                                        | -1.24 |
| NSUN4                 | NOP2/Sun domain family, member 4                                                                                                                                  | 2.4  | STARD9              | StAR-related lipid transfer<br>(START) domain containing 9                                                                                                                               | -1.24 |
| C7H6orf125            | uncharacterized protein C6orf125<br>homolog                                                                                                                       | 2.39 | INTS7               | integrator complex subunit 7                                                                                                                                                             | -1.25 |
| EIF4A3; LOC100739660  | eukaryotic translation initiation factor<br>4A3; eukaryotic initiation factor 4A-III-<br>like                                                                     | 2.38 | SPARCL1             | SPARC-like 1 (hevin)                                                                                                                                                                     | -1.25 |
| NDUFA10               | NADH dehydrogenase (ubiquinone) 1<br>alpha subcomplex, 10, 42kDa                                                                                                  | 2.36 | TFPI2               | tissue factor pathway inhibitor 2                                                                                                                                                        | -1.25 |
| KHDRBS3; LOC100625959 | KH domain containing, RNA binding,<br>signal transduction associated 3; KH<br>domain-containing, RNA-binding,<br>signal transduction-associated protein<br>3-like | 2.33 | TPRA1               | transmembrane protein, adipocyte<br>associated 1                                                                                                                                         | -1.25 |
| CHCHD5                | coiled-coil-helix-coiled-coil-helix<br>domain containing 5                                                                                                        | 2.32 | ACCS; ACCSL         | 1-aminocyclopropane-1-<br>carboxylate synthase homolog<br>(Arabidopsis)(non-functional); 1-<br>aminocyclopropane-1-carboxylate<br>synthase homolog<br>(Arabidopsis)(non-functional)-like | -1.26 |
| OSBP2                 | oxysterol binding protein 2                                                                                                                                       | 2.3  | C5H12orf60          | chromosome 5 open reading frame.<br>human C12orf60                                                                                                                                       | -1.26 |
| C1H9orf16; LCN2       | chromosome 1 open reading frame.<br>human C9orf16; lipocalin 2                                                                                                    | 2.29 | FAM161B             | family with sequence similarity<br>161, member B                                                                                                                                         | -1.26 |
| GRK4                  | G protein-coupled receptor kinase 4                                                                                                                               | 2.28 | GJC1                | gap junction protein, gamma 1,<br>45kDa                                                                                                                                                  | -1.26 |
| PSMF1; LOC100736938   | proteasome inhibitor subunit 1;<br>proteasome inhibitor PI31 subunit                                                                                              | 2.28 | GJC1                | gap junction protein, gamma 1,<br>45kDa                                                                                                                                                  | -1.26 |
| CATSPERG              | catsper channel auxiliary subunit<br>gamma                                                                                                                        | 2.27 | LOC102164408; BRCC3 | uncharacterized LOC102164408;<br>BRCA1/BRCA2-containing<br>complex, subunit 3                                                                                                            | -1.26 |
| MFAF3L                | microfibrillar-associated protein 3-like                                                                                                                          | 2.26 | ZNF283              | zinc finger protein 283                                                                                                                                                                  | -1.26 |

|                                  |                                                                                               |      |                            |                                                                                                                |       |
|----------------------------------|-----------------------------------------------------------------------------------------------|------|----------------------------|----------------------------------------------------------------------------------------------------------------|-------|
| TSACC                            | TSSK6 activating co-chaperone                                                                 | 2.25 | LOC100515880; LOC100737570 | olfactory receptor 2C3-like                                                                                    | -1.27 |
| LOC100155534                     | verprolin-like                                                                                | 2.24 | TMEM38A                    | transmembrane protein 38A                                                                                      | -1.27 |
| LOC102166949                     | E3 ubiquitin-protein ligase RNF169                                                            | 2.24 | ACVRIC                     | activin A receptor, type IC                                                                                    | -1.28 |
| NEURL1                           | neutralized E3 ubiquitin protein ligase 1                                                     | 2.24 | DDIAS                      | DNA damage-induced apoptosis suppressor                                                                        | -1.28 |
| FAM46C                           | family with sequence similarity 46, member C                                                  | 2.22 | FRMD3                      | FERM domain containing 3                                                                                       | -1.28 |
| ISG20L2                          | interferon stimulated exonuclease gene 20kDa-like 2                                           | 2.19 | LOC100153559; LOC102165373 | leucine rich adaptor protein 1-like                                                                            | -1.28 |
| MIEF1                            | mitochondrial elongation factor 1                                                             | 2.19 | LOC100522904               | nucleoporin NUP53-like                                                                                         | -1.28 |
| HTR4; LOC100737835               | 5-hydroxytryptamine (serotonin) receptor 4, G protein-coupled; 5-hydroxytryptamine receptor 4 | 2.18 | NUF2                       | NUF2, NDC80 kinetochore complex component                                                                      | -1.28 |
| VRK3                             | vaccinia related kinase 3                                                                     | 2.16 | CCNJ                       | cyclin J                                                                                                       | -1.29 |
| CARM1                            | coactivator-associated arginine methyltransferase 1                                           | 2.15 | HKDC1                      | hexokinase domain containing 1                                                                                 | -1.29 |
| LOC100152461; LOC100627430; NFYA | nuclear transcription factor Y subunit alpha; nuclear transcription factor Y, alpha           | 2.15 | TARBP1                     | TAR (HIV-1) RNA binding protein 1                                                                              | -1.29 |
| LOC100157936; LOC102162592       | E3 ubiquitin-protein ligase NRDP1; E3 ubiquitin-protein ligase NRDP1-like                     | 2.13 | MMP19                      | matrix metalloproteinase 19                                                                                    | -1.3  |
| LOC102162328                     | uncharacterized LOC102162328                                                                  | 2.13 | PIWIL4                     | piwi-like RNA-mediated gene silencing 4                                                                        | -1.3  |
| SYCE2                            | synaptonemal complex central element protein 2                                                | 2.12 | SLC25A45                   | solute carrier family 25, member 45                                                                            | -1.3  |
| UBE2D2                           | ubiquitin-conjugating enzyme E2D 2                                                            | 2.12 | WDR89                      | WD repeat domain 89                                                                                            | -1.3  |
| LOC100625908; LOC102162228       | uncharacterized LOC100625908; uncharacterized LOC102162228                                    | 2.1  | XKR7; LOC100525014         | XK, Kell blood group complex subunit-related family, member 7; cerebral cavernous malformations 2 protein-like | -1.3  |
| ACTR3B                           | ARP3 actin-related protein 3 homolog B (yeast)                                                | 2.09 | ACVR2B                     | activin A receptor, type IIB                                                                                   | -1.31 |
| CCNY                             | cyclin Y                                                                                      | 2.09 | ADAM29                     | ADAM metalloproteinase domain 29                                                                               | -1.31 |
| CPEB3                            | cytoplasmic polyadenylation element binding protein 3                                         | 2.09 | FGD4                       | FYVE, RhoGEF and PH domain containing 4                                                                        | -1.31 |
| LOC100511504; LOC100515480       | maestro heat-like repeat-containing protein family member 1                                   | 2.09 | FGFR4                      | fibroblast growth factor receptor 4                                                                            | -1.31 |
| LOC100737397; C1H9orf9           | uncharacterized protein C9orf9 homolog; chromosome 1 open reading frame, human C9orf9         | 2.07 | HOGA1                      | 4-hydroxy-2-oxoglutarate aldolase 1                                                                            | -1.31 |
| LOC102158209                     | uncharacterized LOC102158209                                                                  | 2.04 | LOC100511312               | transmembrane emp24 domain-containing protein 9                                                                | -1.31 |
| REEP2                            | receptor accessory protein 2                                                                  | 2.04 | LOC100522425               | olfactory receptor 5M3-like                                                                                    | -1.31 |
| TTC7A                            | tetratricopeptide repeat domain 7A                                                            | 2.04 | LOC100623141; APOD         | apolipoprotein D-like; apolipoprotein D                                                                        | -1.31 |
| GNA12                            | guanine nucleotide binding protein (G protein) alpha 12                                       | 2.02 | LOC100736865               | PLASMODESMATA CALLOSE-BINDING PROTEIN 4-like                                                                   | -1.31 |
| PIM3; BRD1                       | Pim-3 proto-oncogene, serine/threonine kinase; bromodomain containing 1                       | 2.02 | LOC102162154               | uncharacterized LOC102162154                                                                                   | -1.31 |
| DESI1                            | desumoylating isopeptidase 1                                                                  | 2    | MIR221                     | microRNA mir-221                                                                                               | -1.31 |
| LIPE                             | lipase, hormone-sensitive                                                                     | 1.99 | SNCAIP                     | synuclein, alpha interacting protein                                                                           | -1.31 |

|                                   |                                                                                                                                                       |      |                                                        |                                                                                                                                |       |
|-----------------------------------|-------------------------------------------------------------------------------------------------------------------------------------------------------|------|--------------------------------------------------------|--------------------------------------------------------------------------------------------------------------------------------|-------|
| LOC100523970; MAD2L2              | mitotic spindle assembly checkpoint protein MAD2B; MAD2 mitotic arrest deficient-like 2 (yeast)                                                       | 1.99 | C7H6orf52                                              | chromosome 7 open reading frame. human C6orf52                                                                                 | -1.32 |
| LPIN1; LOC100620364               | lipin 1; phosphatidate phosphatase LPIN1-like                                                                                                         | 1.98 | ORC4                                                   | origin recognition complex. subunit 4                                                                                          | -1.32 |
| LOC100513137                      | phospholipid-transporting ATPase IK                                                                                                                   | 1.97 | BET1                                                   | Bet1 golgi vesicular membrane trafficking protein                                                                              | -1.33 |
| LOC102168155; SUGCT; LOC106508407 | succinate-hydroxymethylglutarate CoA-transferase; succinyl-CoA:glutarate-CoA transferase; succinate-hydroxymethylglutarate CoA-transferase pseudogene | 1.96 | C13H3orf18                                             | chromosome 13 open reading frame. human C3orf18                                                                                | -1.33 |
| LOC100736929                      | uncharacterized LOC100736929                                                                                                                          | 1.95 | GPR183                                                 | G protein-coupled receptor 183                                                                                                 | -1.33 |
| SPATA3                            | spermatogenesis associated 3                                                                                                                          | 1.95 | PPFIA2; LOC102164936                                   | protein tyrosine phosphatase. receptor type. f polypeptide (PTPRF). interacting protein (liprin). alpha 2; liprin-alpha-2-like | -1.33 |
| ENO3                              | enolase 3 (beta. muscle)                                                                                                                              | 1.94 | ADAM7                                                  | ADAM metallopeptidase domain 7                                                                                                 | -1.34 |
| LOC100515534                      | uncharacterized LOC100515534                                                                                                                          | 1.94 | LOC100520008                                           | guanine nucleotide-binding protein G(I)/G(S)/G(O) subunit gamma-7-like                                                         | -1.34 |
| LOC102163404; KDM5B               | lysine-specific demethylase 5B; lysine (K)-specific demethylase 5B                                                                                    | 1.93 | LOC100739844; LOC100736608; LOC102163327; LOC106507218 | semaphorin-3A-like; semaphorin-3A; uncharacterized LOC106507218                                                                | -1.34 |
| MOBKL3                            | MOB family member 4. phocein                                                                                                                          | 1.93 | TGM6                                                   | transglutaminase 6                                                                                                             | -1.34 |
| LOC100154378                      | cAMP and cAMP-inhibited cGMP 3,5-cyclic phosphodiesterase 10A                                                                                         | 1.92 | ADIPOR2                                                | adiponectin receptor 2                                                                                                         | -1.35 |
| NT5M                              | 5,3-nucleotidase. mitochondrial                                                                                                                       | 1.91 | DDO                                                    | D-aspartate oxidase                                                                                                            | -1.35 |
| ATN1                              | atrophin 1                                                                                                                                            | 1.9  | DMBT1                                                  | deleted in malignant brain tumors 1                                                                                            | -1.35 |
| CIB1                              | calcium and integrin binding 1 (calmyrin)                                                                                                             | 1.9  | ETV1                                                   | ets variant 1                                                                                                                  | -1.35 |
| DNAJB6                            | DnaJ (Hsp40) homolog. subfamily B. member 6                                                                                                           | 1.88 | ITLN2; LOC100736733                                    | intelectin 2; intelectin-2-like                                                                                                | -1.35 |
| KAT7                              | K(lysine) acetyltransferase 7                                                                                                                         | 1.88 | LOC100157427                                           | nesprin-1-like                                                                                                                 | -1.35 |
| LOC100739821                      | zinc finger MIZ domain-containing protein 2                                                                                                           | 1.88 | LOC100515441                                           | olfactory receptor 52A5-like                                                                                                   | -1.35 |
| L3MBTL2                           | l(3)mbt-like 2 (Drosophila)                                                                                                                           | 1.87 | LOC100522145                                           | taurochenodeoxycholic 6 alpha-hydroxylase-like                                                                                 | -1.35 |
| C7H6orf106                        | chromosome 7 open reading frame. human C6orf106                                                                                                       | 1.86 | STXBP6                                                 | syntaxin binding protein 6 (amisyn)                                                                                            | -1.35 |
| CPA5; LOC100625420                | carboxypeptidase A5                                                                                                                                   | 1.83 | LOC100519107                                           | keratin-associated protein 2-4-like                                                                                            | -1.36 |
| LOC102161765                      | ral guanine nucleotide dissociation stimulator-like                                                                                                   | 1.83 | NAGS                                                   | N-acetylglutamate synthase                                                                                                     | -1.36 |
| PRKCQ                             | protein kinase C. theta                                                                                                                               | 1.83 | ST6GALNAC4                                             | ST6 (alpha-N-acetyl-neuraminyl-2,3-beta-galactosyl-1,3)-N-acetylgalactosaminide alpha-2,6-sialyltransferase 4                  | -1.36 |
| ZNRF4                             | zinc and ring finger 4                                                                                                                                | 1.83 | THNSL1                                                 | threonine synthase-like 1 (S. cerevisiae)                                                                                      | -1.36 |
| LOC100156879                      | cytochrome b-c1 complex subunit 1. mitochondrial                                                                                                      | 1.82 | GRID1; LOC102160253; LOC100739571; LOC100739538        | glutamate receptor. ionotropic. delta 1; glutamate receptor ionotropic. delta-1-like                                           | -1.37 |

|                        |                                                                                                   |      |                            |                                                                                                   |       |
|------------------------|---------------------------------------------------------------------------------------------------|------|----------------------------|---------------------------------------------------------------------------------------------------|-------|
| KLHL25                 | kelch-like family member 25                                                                       | 1.81 | LOC100525652; LOC100738424 | olfactory receptor 51L1-like                                                                      | -1.37 |
| LOC100620325; ERO1B    | ERO1-like protein beta; endoplasmic reticulum oxidoreductase beta                                 | 1.81 | LOC100526139               | discoidin, CUB and LCCL domain-containing protein 2                                               | -1.37 |
| ERI3                   | ERI1 exonuclease family member 3                                                                  | 1.8  | LOC106510733               | cytochrome P450 4A25-like                                                                         | -1.37 |
| RFX4                   | regulatory factor X. 4 (influences HLA class II expression)                                       | 1.8  | PPAG3                      | pregnancy-associated glycoprotein 3                                                               | -1.37 |
| RPS6KC1                | ribosomal protein S6 kinase. 52kDa. polypeptide 1                                                 | 1.8  | MTHFD1L                    | methylenetetrahydrofolate dehydrogenase (NADP+ dependent) 1-like                                  | -1.38 |
| SMPD2                  | sphingomyelin phosphodiesterase 2. neutral membrane (neutral sphingomyelinase)                    | 1.8  | F2RL2                      | coagulation factor II (thrombin) receptor-like 2                                                  | -1.39 |
| LOC100625374           | cyclic nucleotide-binding domain-containing protein 2-like                                        | 1.79 | LOC106508080; LOC100511983 | olfactory receptor 7E24-like; olfactory receptor 18-like                                          | -1.39 |
| DGCR2                  | DiGeorge syndrome critical region gene 2                                                          | 1.78 | PPARGC1B                   | peroxisome proliferator-activated receptor gamma. coactivator 1 beta                              | -1.39 |
| PROCA1; LOC100624269   | protein interacting with cyclin A1; protein PROCA1-like                                           | 1.78 | UBTFL1                     | upstream binding transcription factor. RNA polymerase I-like 1                                    | -1.39 |
| LOC100521004           | SPRY domain-containing SOCS box protein 3-like                                                    | 1.76 | NEUROD1                    | neuronal differentiation 1                                                                        | -1.4  |
| STK17A; LOC100621897   | serine/threonine kinase 17a; serine/threonine-protein kinase 17A                                  | 1.75 | PRRG4                      | proline rich Gla (G-carboxyglutamic acid) 4 (transmembrane)                                       | -1.4  |
| ATG9A                  | autophagy related 9A                                                                              | 1.74 | CHRM5                      | cholinergic receptor. muscarinic 5                                                                | -1.41 |
| DCDC2C                 | doublecortin domain containing 2C                                                                 | 1.73 | LOC100516987               | olfactory receptor 52H1                                                                           | -1.41 |
| LOC100512674           | zinc finger protein 367                                                                           | 1.73 | LOC100739412               | histidine decarboxylase-like                                                                      | -1.41 |
| BANF2                  | barrier to autointegration factor 2                                                               | 1.72 | SERPIN2                    | serpin peptidase inhibitor. clade 1 (pancpin). member 2                                           | -1.41 |
| HMGXB3                 | HMG box domain containing 3                                                                       | 1.72 | SLITRK5                    | SLIT and NTRK-like family. member 5                                                               | -1.41 |
| UBE2J2                 | ubiquitin-conjugating enzyme E2. J2                                                               | 1.72 | DEFB123                    | defensin. beta 123                                                                                | -1.43 |
| CHST13                 | carbohydrate (chondroitin 4) sulfotransferase 13                                                  | 1.7  | HFM1                       | HFM1. ATP-dependent DNA helicase homolog                                                          | -1.43 |
| LIN52                  | lin-52 DREAM MuvB core complex component                                                          | 1.7  | LOC100620198               | T-cell receptor-associated transmembrane adapter 1                                                | -1.43 |
| LOC100152291           | uncharacterized LOC100152291                                                                      | 1.7  | ITGB8                      | integrin. beta 8                                                                                  | -1.44 |
| POC1A                  | POC1 centriolar protein A                                                                         | 1.7  | OLF42-3                    | olfactory receptor-like protein-like                                                              | -1.44 |
| UBXN6                  | UBX domain protein 6                                                                              | 1.7  | TMEFF2                     | transmembrane protein with EGF-like and two follistatin-like domains 2                            | -1.44 |
| CTXN1                  | cortxin 1                                                                                         | 1.69 | CFTR                       | cystic fibrosis transmembrane conductance regulator (ATP-binding cassette sub-family C. member 7) | -1.45 |
| SLC25A33; LOC106510614 | solute carrier family 25 (pyrimidine nucleotide carrier). member 33; uncharacterized LOC106510614 | 1.69 | IFNK                       | interferon. kappa                                                                                 | -1.45 |
| CBFA2T3                | core-binding factor. runt domain. alpha subunit 2; translocated to. 3                             | 1.68 | XCR1                       | chemokine (C motif) receptor 1                                                                    | -1.45 |
| CECR2                  | cat eye syndrome chromosome region. candidate 2                                                   | 1.67 | CXHorf66                   | chromosome X open reading frame. human CXorf66                                                    | -1.46 |
| LOC100522627           | olfactory receptor 10R2-like                                                                      | 1.67 | FEZF2; LOC100622205        | FEZ family zinc finger 2; fez family zinc finger protein 2                                        | -1.46 |

|                                   |                                                                                                            |      |                            |                                                                            |       |
|-----------------------------------|------------------------------------------------------------------------------------------------------------|------|----------------------------|----------------------------------------------------------------------------|-------|
| LMBR1; LOC102165610               | limb development membrane protein 1; uncharacterized LOC102165610                                          | 1.65 | GDA                        | guanine deaminase                                                          | -1.46 |
| LOC100511053; LOC100624021        | zinc finger protein PLAGL2                                                                                 | 1.65 | KLRF1                      | killer cell lectin-like receptor subfamily F, member 1                     | -1.46 |
| FAM166A                           | family with sequence similarity 166, member A                                                              | 1.63 | GNAT3                      | guanine nucleotide binding protein, alpha transducing 3                    | -1.47 |
| JOSD2                             | Josephin domain containing 2                                                                               | 1.63 | ANGPTL1                    | angiotensin-like 1                                                         | -1.48 |
| LOC100153504; LOC100625760        | coagulation factor XIII A chain; coagulation factor XIII A chain-like                                      | 1.63 | GLI1; LOC100621250         | GLI family zinc finger 1; zinc finger protein GLI1-like                    | -1.48 |
| PPHLN1                            | periphilin 1                                                                                               | 1.63 | RFPL4B                     | ret finger protein-like 4B                                                 | -1.48 |
| TTC7B; LOC100738752; LOC102162885 | tetratricopeptide repeat domain 7B; tetratricopeptide repeat protein 7B-like; uncharacterized LOC102162885 | 1.63 | TEX26                      | testis expressed 26                                                        | -1.49 |
| FGFR2                             | fibroblast growth factor receptor 2                                                                        | 1.62 | GDF9                       | growth differentiation factor 9                                            | -1.5  |
| FMR1NB                            | fragile X mental retardation 1 neighbor                                                                    | 1.62 | ARL15                      | ADP-ribosylation factor-like 15                                            | -1.51 |
| LOC100154280                      | sex comb on midleg-like protein 4                                                                          | 1.62 | CTNNA3                     | catenin (cadherin-associated protein), alpha 3                             | -1.52 |
| LOC100517569; LOC100154999        | lysine-specific demethylase 4C-like; lysine-specific demethylase 4C                                        | 1.62 | DLG5                       | discs, large homolog 5 (Drosophila)                                        | -1.52 |
| POLB                              | polymerase (DNA directed), beta                                                                            | 1.62 | LOC100623462               | olfactory receptor 1J4-like                                                | -1.53 |
| PRR30                             | proline rich 30                                                                                            | 1.62 | LOC100736882               | interferon lambda receptor 1-like                                          | -1.53 |
| GMD5                              | GDP-mannose 4,6-dehydratase                                                                                | 1.61 | SYT1                       | synaptotagmin I                                                            | -1.55 |
| POU3F2                            | POU class 3 homeobox 2                                                                                     | 1.61 | FBXO30                     | F-box protein 30                                                           | -1.56 |
| SEC61A2; LOC100627954             | Sec61 translocon alpha 2 subunit; protein transport protein Sec61 subunit alpha isoform 2-like             | 1.61 | TNFSF10                    | tumor necrosis factor (ligand superfamily, member 10)                      | -1.56 |
| ZFAND3                            | zinc finger, AN1-type domain 3                                                                             | 1.61 | IFIT3                      | interferon-induced protein with tetratricopeptide repeats 3                | -1.58 |
| ELOF1                             | ELF1 homolog, elongation factor 1                                                                          | 1.6  | LOC100517243               | adipogenesis regulatory factor                                             | -1.58 |
| FKBP8                             | FK506 binding protein 8, 38kDa                                                                             | 1.6  | USH2A                      | Usher syndrome 2A (autosomal recessive, mild)                              | -1.58 |
| GPAT3                             | glycerol-3-phosphate acyltransferase 3                                                                     | 1.6  | LOC100151788               | dimethylaniline monooxygenase [N-oxide-forming] 5-like                     | -1.59 |
| KLC1                              | kinesin light chain 1                                                                                      | 1.6  | LPAR6                      | lysophosphatidic acid receptor 6                                           | -1.59 |
| LOC100522038                      | poly(ADP-ribose) glycohydrolase                                                                            | 1.6  | LOC100156546               | olfactory receptor 12D3                                                    | -1.6  |
| RNF32                             | ring finger protein 32                                                                                     | 1.6  | FAM19A3                    | family with sequence similarity 19 (chemokine (C-C motif)-like), member A3 | -1.62 |
| KCTD9                             | potassium channel tetramerization domain containing 9                                                      | 1.59 | IL23R                      | interleukin 23 receptor                                                    | -1.62 |
| SH2D4A                            | SH2 domain containing 4A                                                                                   | 1.59 | LOC100523309               | olfactory receptor 6K3-like                                                | -1.62 |
| ERC1                              | ELKS/RAB6-interacting/CAST family member 1                                                                 | 1.58 | CDH10                      | cadherin 10, type 2 (T2-cadherin)                                          | -1.63 |
| USP2                              | ubiquitin specific peptidase 2                                                                             | 1.58 | TMEM39A                    | transmembrane protein 39A                                                  | -1.63 |
| ZNF25                             | zinc finger protein 25                                                                                     | 1.58 | UBD                        | ubiquitin D                                                                | -1.63 |
| DOLPP1                            | dolichylidiphosphatase 1                                                                                   | 1.57 | LOC100157958               | laminin subunit gamma-3                                                    | -1.66 |
| NRG4                              | neuregulin 4                                                                                               | 1.57 | AKAP7                      | A kinase (PRKA) anchor protein 7                                           | -1.69 |
| AP1M1                             | adaptor-related protein complex 1, mu 1 subunit                                                            | 1.56 | GYP A                      | glycophorin A (MNS blood group)                                            | -1.69 |
| ASGR2                             | asialoglycoprotein receptor 2                                                                              | 1.56 | TEAD3                      | TEA domain family member 3                                                 | -1.69 |
| CEP128                            | centrosomal protein 128kDa                                                                                 | 1.56 | LOC100519039; LOC100737158 | olfactory receptor 51V1-like                                               | -1.7  |
| FAM63A                            | family with sequence similarity 63, member A                                                               | 1.56 | LOC100157508               | olfactory receptor 4K13                                                    | -1.72 |

|                                             |                                                                                                                               |      |                            |                                               |       |
|---------------------------------------------|-------------------------------------------------------------------------------------------------------------------------------|------|----------------------------|-----------------------------------------------|-------|
| ENTPD5                                      | ectonucleoside triphosphate diphosphohydrolase 5                                                                              | 1.55 | RAB38                      | RAB38, member RAS oncogene family             | -1.73 |
| CLDN4                                       | claudin 4                                                                                                                     | 1.54 | SYT10                      | synaptotagmin X                               | -1.75 |
| TWSG1                                       | twisted gastrulation BMP signaling modulator 1                                                                                | 1.54 | LOC100516985               | olfactory receptor 4L1-like                   | -1.78 |
| C2H1orf94                                   | chromosome 2 open reading frame. human C1orf94                                                                                | 1.53 | WFDC9                      | WAP four-disulfide core domain 9              | -1.78 |
| LOC100524756                                | cell adhesion molecule 1                                                                                                      | 1.53 | LOC100157798               | olfactory receptor 4N4                        | -1.79 |
| ARL9                                        | ADP-ribosylation factor-like 9                                                                                                | 1.52 | LRRN3                      | leucine rich repeat neuronal 3                | -1.79 |
| LOC100516692;<br>LOC100737702; LOC100516509 | testis-expressed sequence 29 protein; rho guanine nucleotide exchange factor 7; rho guanine nucleotide exchange factor 7-like | 1.52 | LOC106504870               | caspase-12-like                               | -1.82 |
| CXCL16                                      | chemokine (C-X-C motif) ligand 16                                                                                             | 1.51 | CCDC102B                   | coiled-coil domain containing 102B            | -1.84 |
| LOC100625074; LOC102162253                  | uncharacterized protein KIAA0895-like                                                                                         | 1.51 | LOC100522603               | olfactory receptor 8K3-like                   | -1.89 |
| LOC100625124; LOC100154036                  | MICAL-like protein 1                                                                                                          | 1.51 | CCR7                       | chemokine (C-C motif) receptor 7              | -1.9  |
| NSUN6                                       | NOP2/Sun domain family, member 6                                                                                              | 1.51 | LOC100523626               | olfactory receptor 56B1                       | -1.94 |
| PAQR7; LOC100737469                         | progesterin and adipoQ receptor family member VII; membrane progesterin receptor alpha                                        | 1.51 | IFN-DELTA-4; LOC100736862  | interferon-delta-4; interferon tau-11-like    | -2    |
| SLC25A46                                    | solute carrier family 25, member 46                                                                                           | 1.51 | FOXP2; LOC100620234        | forkhead box P2; forkhead box protein P2-like | -2.03 |
| ANKRD35                                     | ankyrin repeat domain 35                                                                                                      | 1.5  | LOC100155405               | olfactory receptor 4K1                        | -2.03 |
| LOC100622412                                | histone H3                                                                                                                    | 1.5  | LOC100516093               | olfactory receptor 52N4                       | -2.27 |
| LOC102160066; LOC102160158                  | uncharacterized LOC102160066; uncharacterized LOC102160158                                                                    | 1.5  | LOC100517289               | E3 ubiquitin-protein ligase RNF220            | -2.41 |
| TRAPP9                                      | trafficking protein particle complex 9                                                                                        | 1.5  | LOC100738965; LOC100739445 | olfactory receptor 1J4-like                   | -2.49 |
| EXD1; LOC100621282                          | exonuclease 3-5 domain containing 1; exonuclease 3-5 domain-containing protein 1-like                                         | 1.49 | LOC100525437               | ATP synthase subunit d, mitochondrial-like    | -3.06 |
| NANOS1                                      | nanos homolog 1 (Drosophila)                                                                                                  | 1.49 | LOC100157815               | olfactory receptor 4K15                       | -3.9  |
| SYNGR4                                      | synaptogyrin 4                                                                                                                | 1.49 | LOC100522664; LOC100622735 | olfactory receptor 2AJ1-like                  | -4.97 |
| USP12                                       | ubiquitin specific peptidase 12                                                                                               | 1.49 | LOC100157785               | olfactory receptor 8H1-like                   | -5.22 |
| ANKRD42                                     | ankyrin repeat domain 42                                                                                                      | 1.48 |                            |                                               |       |
| C4H1orf194                                  | chromosome 4 open reading frame. human C1orf194                                                                               | 1.48 |                            |                                               |       |
| LOC100155148                                | mitochondrial intermediate peptidase                                                                                          | 1.48 |                            |                                               |       |
| PRMT8                                       | protein arginine methyltransferase 8                                                                                          | 1.48 |                            |                                               |       |
| WBSCR22                                     | Williams Beuren syndrome chromosome region 22                                                                                 | 1.48 |                            |                                               |       |
| WDTC1                                       | WD and tetratricopeptide repeats 1                                                                                            | 1.48 |                            |                                               |       |
| ZBP                                         | zona pellucida binding protein                                                                                                | 1.48 |                            |                                               |       |
| C7H6orf136                                  | chromosome 7 open reading frame. human C6orf136                                                                               | 1.47 |                            |                                               |       |
| FAM160A2                                    | family with sequence similarity 160, member A2                                                                                | 1.47 |                            |                                               |       |
| LOC100516656; LOC100516841                  | 3-hydroxyisobutyrate dehydrogenase, mitochondrial                                                                             | 1.47 |                            |                                               |       |
| MEMO1                                       | mediator of cell motility 1                                                                                                   | 1.47 |                            |                                               |       |
| PUS7; LOC100627719                          | pseudouridylate synthase 7 (putative); pseudouridylate synthase 7 homolog                                                     | 1.47 |                            |                                               |       |
| FAM214B                                     | family with sequence similarity 214, member B                                                                                 | 1.46 |                            |                                               |       |

|                                                              |                                                                                                            |      |  |  |  |
|--------------------------------------------------------------|------------------------------------------------------------------------------------------------------------|------|--|--|--|
| LOC100626951                                                 | olfactory receptor 51V1-like                                                                               | 1.46 |  |  |  |
| LOC102164918; SHC3                                           | uncharacterized LOC102164918; SHC (Src homology 2 domain containing) transforming protein 3                | 1.46 |  |  |  |
| LOC102166192                                                 | TOX high mobility group box family member 2                                                                | 1.46 |  |  |  |
| LOC106504100; LOC100525714                                   | protein phosphatase 1D-like; protein phosphatase 1D                                                        | 1.46 |  |  |  |
| PI4K2A                                                       | phosphatidylinositol 4-kinase type 2 alpha                                                                 | 1.46 |  |  |  |
| B4GALT7                                                      | xylosylprotein beta 1.4-galactosyltransferase, polypeptide 7                                               | 1.45 |  |  |  |
| BAG6                                                         | BCL2-associated athanogene 6                                                                               | 1.45 |  |  |  |
| LOC100512328;<br>LOC102165593;<br>LOC102166001; LOC102165718 | DENN domain-containing protein 1A;<br>DENN domain-containing protein 1A-like; uncharacterized LOC102165718 | 1.45 |  |  |  |
| MLLT11                                                       | myeloid/lymphoid or mixed-lineage leukemia; translocated to. 11                                            | 1.45 |  |  |  |
| PARN                                                         | poly(A)-specific ribonuclease                                                                              | 1.45 |  |  |  |
| REPS2; LOC100153056                                          | RALBP1 associated Eps domain containing 2; ralBP1-associated Eps domain-containing protein 2-like          | 1.45 |  |  |  |
| SETX                                                         | senataxin                                                                                                  | 1.45 |  |  |  |
| LOC100739624;<br>LOC100739655;<br>LOC102164684; LOC106508498 | syntaxin-binding protein 4; syntaxin-binding protein 4-like                                                | 1.44 |  |  |  |
| MLH3                                                         | mutL homolog 3                                                                                             | 1.44 |  |  |  |
| UGT1A1                                                       | UDP glucuronosyltransferase 1 family, polypeptide A1                                                       | 1.44 |  |  |  |
| CTDNEP1                                                      | CTD nuclear envelope phosphatase 1                                                                         | 1.43 |  |  |  |
| DAP3; LOC100625274                                           | death associated protein 3; 28S ribosomal protein S29, mitochondrial-like                                  | 1.43 |  |  |  |
| FKBP6                                                        | FK506 binding protein 6, 36kDa                                                                             | 1.43 |  |  |  |
| ART3                                                         | ADP-ribosyltransferase 3                                                                                   | 1.42 |  |  |  |
| C16H5orf49                                                   | chromosome 16 open reading frame, human C5orf49                                                            | 1.42 |  |  |  |
| GALNT18                                                      | polypeptide N-acetylgalactosaminyltransferase 18                                                           | 1.42 |  |  |  |
| LIMS2                                                        | LIM and senescent cell antigen-like domains 2                                                              | 1.42 |  |  |  |
| RUNDC3A                                                      | RUN domain containing 3A                                                                                   | 1.42 |  |  |  |
| WDR34                                                        | WD repeat domain 34                                                                                        | 1.42 |  |  |  |
| FGF9                                                         | fibroblast growth factor 9                                                                                 | 1.41 |  |  |  |
| FGFR1OP                                                      | FGFR1 oncogene partner                                                                                     | 1.41 |  |  |  |
| KLHL3                                                        | kelch-like family member 3                                                                                 | 1.41 |  |  |  |
| LRRC51                                                       | leucine-rich repeat-containing protein 51                                                                  | 1.41 |  |  |  |
| GANC                                                         | glucosidase, alpha; neutral C                                                                              | 1.4  |  |  |  |
| LMNB1                                                        | lamin B1                                                                                                   | 1.4  |  |  |  |
| PSMB8                                                        | proteasome subunit beta 8; proteasome (prosome, macropain) subunit, beta                                   | 1.4  |  |  |  |



|                                             |                                                                                       |      |  |  |  |
|---------------------------------------------|---------------------------------------------------------------------------------------|------|--|--|--|
|                                             | type. 8 (large multifunctional peptidase<br>7)                                        |      |  |  |  |
| ZDHC7                                       | zinc finger, DHHC-type containing 7                                                   | 1.4  |  |  |  |
| BOLA1                                       | bolA family member 1                                                                  | 1.39 |  |  |  |
| CPA4                                        | carboxypeptidase A4                                                                   | 1.39 |  |  |  |
| ILKAP                                       | integrin-linked kinase-associated<br>serine/threonine phosphatase                     | 1.39 |  |  |  |
| NTMT1                                       | N-terminal Xaa-Pro-Lys N-<br>methyltransferase 1                                      | 1.39 |  |  |  |
| PCYT1A                                      | phosphate cytidyltransferase 1.<br>choline, alpha                                     | 1.39 |  |  |  |
| SOWAHD                                      | soosondawah ankyrin repeat domain<br>family member D                                  | 1.39 |  |  |  |
| TMEM8A                                      | transmembrane protein 8A                                                              | 1.39 |  |  |  |
| TRAF3                                       | TNF receptor-associated factor 3                                                      | 1.39 |  |  |  |
| FLAD1                                       | flavin adenine dinucleotide synthetase<br>1                                           | 1.38 |  |  |  |
| LOC100154202                                | mitogen-activated protein kinase<br>kinase kinase 4                                   | 1.38 |  |  |  |
| NSDHL                                       | NAD(P) dependent steroid<br>dehydrogenase-like                                        | 1.38 |  |  |  |
| SCML2                                       | sex comb on midleg-like 2 (Drosophila)                                                | 1.38 |  |  |  |
| TECR                                        | trans-2,3-enoyl-CoA reductase                                                         | 1.38 |  |  |  |
| ZNF268                                      | zinc finger protein 268                                                               | 1.38 |  |  |  |
| TCF21                                       | transcription factor 21                                                               | 1.37 |  |  |  |
| ZNHIT6                                      | zinc finger, HIT-type containing 6                                                    | 1.37 |  |  |  |
| ARL2BP                                      | ADP-ribosylation factor-like 2 binding<br>protein                                     | 1.36 |  |  |  |
| LOC100524488                                | nucleotide exchange factor SIL1-like                                                  | 1.36 |  |  |  |
| LOC102161486                                | ubiquitin carboxyl-terminal hydrolase<br>32-like                                      | 1.36 |  |  |  |
| NOD1                                        | nucleotide-binding oligomerization<br>domain containing 1                             | 1.35 |  |  |  |
| PDIA3                                       | protein disulfide isomerase family A.<br>member 3                                     | 1.35 |  |  |  |
| TMEM27                                      | transmembrane protein 27                                                              | 1.35 |  |  |  |
| TRAPPC2L                                    | trafficking protein particle complex 2-<br>like                                       | 1.35 |  |  |  |
| WDR27; LOC102162401;<br>LOC102161809        | WD repeat domain 27; uncharacterized<br>LOC102162401; uncharacterized<br>LOC102161809 | 1.35 |  |  |  |
| AP2A1                                       | adaptor-related protein complex 2.<br>alpha 1 subunit                                 | 1.34 |  |  |  |
| FUT8                                        | fucosyltransferase 8 (alpha (1.6)<br>fucosyltransferase)                              | 1.34 |  |  |  |
| KIF15                                       | kinesin family member 15                                                              | 1.34 |  |  |  |
| LOC100737129; LOC100512723                  | GTP-binding protein 2-like                                                            | 1.34 |  |  |  |
| LOC106508607                                | uncharacterized LOC106508607                                                          | 1.34 |  |  |  |
| LOC106509520;<br>LOC100517752; LOC100515712 | colorectal mutant cancer protein-like;<br>colorectal mutant cancer protein            | 1.34 |  |  |  |
| MGAT4B                                      | mannosyl (alpha-1,3-)-glycoprotein<br>beta-1,4-N-                                     | 1.34 |  |  |  |

|                                      |                                                                                                                                                                             |      |  |  |  |
|--------------------------------------|-----------------------------------------------------------------------------------------------------------------------------------------------------------------------------|------|--|--|--|
|                                      | acetylglucosaminyltransferase.<br>isozyme B                                                                                                                                 |      |  |  |  |
| RAD51C                               | RAD51 paralog C                                                                                                                                                             | 1.34 |  |  |  |
| BARX2                                | BARX homeobox 2                                                                                                                                                             | 1.33 |  |  |  |
| BTBD9                                | BTB (POZ) domain containing 9                                                                                                                                               | 1.33 |  |  |  |
| DNAAF1; LOC100737963                 | dynein, axonemal, assembly factor 1;<br>uncharacterized LOC100737963                                                                                                        | 1.33 |  |  |  |
| FAM177A1                             | family with sequence similarity 177.<br>member A1                                                                                                                           | 1.33 |  |  |  |
| LOC100524199; LOC100620736           | transcription factor 25                                                                                                                                                     | 1.33 |  |  |  |
| P14ARF                               | p14ARF protein                                                                                                                                                              | 1.33 |  |  |  |
| ZNF568                               | zinc finger protein 568                                                                                                                                                     | 1.33 |  |  |  |
| COPS7A                               | COP9 signalosome subunit 7A                                                                                                                                                 | 1.32 |  |  |  |
| FGFR2                                | fibroblast growth factor receptor 2                                                                                                                                         | 1.32 |  |  |  |
| LCORL                                | ligand dependent nuclear receptor<br>corepressor-like                                                                                                                       | 1.32 |  |  |  |
| LOC100157862                         | sortilin                                                                                                                                                                    | 1.32 |  |  |  |
| LOC102166011; RNGTT                  | uncharacterized LOC102166011; RNA<br>guanylyltransferase and 5-phosphatase                                                                                                  | 1.32 |  |  |  |
| MORN5                                | MORN repeat containing 5                                                                                                                                                    | 1.32 |  |  |  |
| NMNAT1; LOC100622997                 | nicotinamide nucleotide<br>adenylyltransferase 1;<br>nicotinamide/nicotinic acid<br>mononucleotide adenylyltransferase 1-<br>like                                           | 1.32 |  |  |  |
| PDZD8                                | PDZ domain containing 8                                                                                                                                                     | 1.32 |  |  |  |
| RNF125                               | ring finger protein 125. E3 ubiquitin<br>protein ligase                                                                                                                     | 1.32 |  |  |  |
| WFDC3                                | WAP four-disulfide core domain 3                                                                                                                                            | 1.32 |  |  |  |
| C17H20orf27                          | chromosome 17 open reading frame.<br>human C20orf27                                                                                                                         | 1.31 |  |  |  |
| SH3GL1                               | SH3-domain GRB2-like 1                                                                                                                                                      | 1.31 |  |  |  |
| CNGA4                                | cyclic nucleotide gated channel alpha 4                                                                                                                                     | 1.3  |  |  |  |
| GMCL1; LOC100625379                  | germ cell-less, spermatogenesis<br>associated 1; germ cell-less protein-like<br>1                                                                                           | 1.3  |  |  |  |
| LOC102163983                         | zinc finger protein 341                                                                                                                                                     | 1.3  |  |  |  |
| NUP214                               | nucleoporin 214kDa                                                                                                                                                          | 1.3  |  |  |  |
| LOC100512967; LOC106510605           | tumor protein p73-like                                                                                                                                                      | 1.29 |  |  |  |
| LOC100516196; LOC106507553           | TATA box-binding protein-associated<br>factor RNA polymerase I subunit C;<br>uncharacterized LOC106507553                                                                   | 1.29 |  |  |  |
| RTN3                                 | reticulon 3                                                                                                                                                                 | 1.29 |  |  |  |
| TRMT1; LOC100524134;<br>LOC100623538 | tRNA methyltransferase 1 homolog (S.<br>cerevisiae); TRM1 tRNA<br>methyltransferase 1 homolog (S.<br>cerevisiae)-like; tRNA (guanine(26)-<br>N(2))-dimethyltransferase-like | 1.29 |  |  |  |
| ATP6V0A2                             | ATPase, H+ transporting, lysosomal V0<br>subunit a2                                                                                                                         | 1.28 |  |  |  |
| ELAVL2                               | ELAV like neuron-specific RNA<br>binding protein 2                                                                                                                          | 1.28 |  |  |  |
| FUS                                  | FUS RNA binding protein                                                                                                                                                     | 1.28 |  |  |  |

|                            |                                                                                            |      |  |  |  |
|----------------------------|--------------------------------------------------------------------------------------------|------|--|--|--|
| KHDC3L; LOC100153536       | KH domain containing 3-like.<br>subcortical maternal complex member;<br>KHDC3-like protein | 1.28 |  |  |  |
| MDM4                       | MDM4. p53 regulator                                                                        | 1.28 |  |  |  |
| SNX14                      | sorting nexin 14                                                                           | 1.28 |  |  |  |
| AKAP11                     | A kinase (PRKA) anchor protein 11                                                          | 1.27 |  |  |  |
| CSNK1G1; LOC102166996      | casein kinase 1. gamma 1;<br>uncharacterized LOC102166996                                  | 1.27 |  |  |  |
| FAM92A1                    | family with sequence similarity 92.<br>member A1                                           | 1.27 |  |  |  |
| FIBCD1                     | fibrinogen C domain containing 1                                                           | 1.27 |  |  |  |
| METTL2A                    | methyltransferase like 2A                                                                  | 1.27 |  |  |  |
| MIR615                     | microRNA mir-615                                                                           | 1.27 |  |  |  |
| NARFL                      | nuclear prelamin A recognition factor-<br>like                                             | 1.27 |  |  |  |
| VMAC                       | vimentin-type intermediate filament<br>associated coiled-coil protein                      | 1.27 |  |  |  |
| BCKDHA                     | branched chain keto acid<br>dehydrogenase E1. alpha polypeptide                            | 1.26 |  |  |  |
| CENPA                      | centromere protein A                                                                       | 1.26 |  |  |  |
| DUSP1                      | dual specificity phosphatase 1                                                             | 1.26 |  |  |  |
| KCNA3                      | potassium channel. voltage gated<br>shaker related subfamily A. member 3                   | 1.26 |  |  |  |
| KCNIP3                     | Kv channel interacting protein 3.<br>calsenilin                                            | 1.26 |  |  |  |
| KLHDC3                     | kelch domain containing 3                                                                  | 1.26 |  |  |  |
| KRI1                       | KRI1 homolog                                                                               | 1.26 |  |  |  |
| NLGN3; LOC100156236        | neuroligin 3; neuroligin-3                                                                 | 1.26 |  |  |  |
| TRIM72                     | tripartite motif containing 72. E3<br>ubiquitin protein ligase                             | 1.26 |  |  |  |
| UBR7                       | ubiquitin protein ligase E3 component<br>n-recogin 7 (putative)                            | 1.26 |  |  |  |
| APOO                       | apolipoprotein O                                                                           | 1.25 |  |  |  |
| ATP4B                      | ATPase. H+/K+ exchanging. beta<br>polypeptide                                              | 1.25 |  |  |  |
| CRYBB3                     | crystallin. beta B3                                                                        | 1.25 |  |  |  |
| FGF14                      | fibroblast growth factor 14                                                                | 1.25 |  |  |  |
| LOC106505929               | lysine-specific demethylase 2B-like                                                        | 1.25 |  |  |  |
| PACRGL; LOC100623618       | PARK2 co-regulated-like; PACRG-like<br>protein                                             | 1.25 |  |  |  |
| IRF3                       | interferon regulatory factor 3                                                             | 1.24 |  |  |  |
| LAPTM4B                    | lysosomal protein transmembrane 4<br>beta                                                  | 1.24 |  |  |  |
| LOC100738644               | leishmanolysin-like peptidase                                                              | 1.24 |  |  |  |
| PRMT8                      | protein arginine methyltransferase 8                                                       | 1.24 |  |  |  |
| ANKS3                      | ankyrin repeat and sterile alpha motif<br>domain containing 3                              | 1.23 |  |  |  |
| C7H6orf136                 | chromosome 7 open reading frame.<br>human C6orf136                                         | 1.23 |  |  |  |
| LACE1                      | lactation elevated 1                                                                       | 1.23 |  |  |  |
| LOC100738704; LOC106504099 | TNFAIP3-interacting protein 3;<br>TNFAIP3-interacting protein 3-like                       | 1.23 |  |  |  |
| LOC102160001               | serine protease inhibitor Kazal-type 6                                                     | 1.23 |  |  |  |

|                          |                                                                                                                                       |      |  |  |  |
|--------------------------|---------------------------------------------------------------------------------------------------------------------------------------|------|--|--|--|
| STYX                     | serine/threonine/tyrosine interacting protein                                                                                         | 1.23 |  |  |  |
| MBTPS2                   | membrane-bound transcription factor peptidase, site 2                                                                                 | 1.22 |  |  |  |
| PPP3CC; LOC100623062     | protein phosphatase 3, catalytic subunit, gamma isozyme; serine/threonine-protein phosphatase 2B catalytic subunit gamma isoform-like | 1.22 |  |  |  |
| SLC2A11                  | solute carrier family 2 (facilitated glucose transporter), member 11                                                                  | 1.22 |  |  |  |
| ARHGAP39; LOC100155247   | Rho GTPase activating protein 39; rho GTPase-activating protein 39                                                                    | 1.21 |  |  |  |
| C9H11orf42               | chromosome 9 open reading frame, human C11orf42                                                                                       | 1.21 |  |  |  |
| MAP4K2                   | mitogen-activated protein kinase kinase kinase 2                                                                                      | 1.21 |  |  |  |
| MTSS1L                   | metastasis suppressor 1-like                                                                                                          | 1.21 |  |  |  |
| TRAM2                    | translocation associated membrane protein 2                                                                                           | 1.21 |  |  |  |
| ATXN7L3                  | ataxin 7-like 3                                                                                                                       | 1.2  |  |  |  |
| BAG4                     | BCL2-associated athanogene 4                                                                                                          | 1.2  |  |  |  |
| CHPT1                    | choline phosphotransferase 1                                                                                                          | 1.2  |  |  |  |
| PPARA; LOC106508632      | peroxisome proliferator-activated receptor alpha; peroxisome proliferator-activated receptor alpha-like                               | 1.2  |  |  |  |
| LOC102161647             | trichohyalin                                                                                                                          | 1.19 |  |  |  |
| MTF2                     | metal response element binding transcription factor 2                                                                                 | 1.19 |  |  |  |
| ACTL7B                   | actin-like 7B                                                                                                                         | 1.18 |  |  |  |
| C3H16orf58; LOC106508701 | chromosome 3 open reading frame, human C16orf58; uncharacterized LOC106508701                                                         | 1.18 |  |  |  |
| LOC102165039             | Ig-like V-type domain-containing protein FAM187A                                                                                      | 1.18 |  |  |  |
| LOC100157935             | cytochrome c oxidase subunit 8C, mitochondrial                                                                                        | 1.17 |  |  |  |
| MXD3                     | MAX dimerization protein 3                                                                                                            | 1.17 |  |  |  |
| ADSL                     | adenylosuccinate lyase                                                                                                                | 1.16 |  |  |  |
| DVL1                     | dishevelled segment polarity protein 1                                                                                                | 1.16 |  |  |  |
| COLGALT1                 | collagen beta(1-O)galactosyltransferase 1                                                                                             | 1.14 |  |  |  |
| KCNH4; LOC100620256      | potassium channel, voltage gated eag related subfamily H, member 4; potassium voltage-gated channel subfamily H member 4-like         | 1.14 |  |  |  |
| LOC102159765             | voltage-dependent P/Q-type calcium channel subunit alpha-1A-like                                                                      | 1.14 |  |  |  |
| LOC733635                | aldo-keto reductase family 1 member C2-like                                                                                           | 1.14 |  |  |  |
| MICU1                    | mitochondrial calcium uptake 1                                                                                                        | 1.14 |  |  |  |
| GNPAT                    | glyceronephosphate O-acyltransferase                                                                                                  | 1.12 |  |  |  |

|         |                                                            |      |  |  |  |
|---------|------------------------------------------------------------|------|--|--|--|
| FAM109A | family with sequence similarity 109.<br>member A           | 1.11 |  |  |  |
| DLGAP2  | discs. large (Drosophila) homolog-<br>associated protein 2 | 1.1  |  |  |  |
